# Supplementary material for: Direct and metal-free arylsulfonylation of alkynes with sulfonylhydrazides for the construction of 3-sulfonated coumarins
Source: Royal Society of Chemistry journal article supplement (doi:10.1039/c4cc08117j), 2014-11-07

## Supplementary Information

### **Direct and metal-free arylsulfonation of alkynes with sulfonylhydrazides for the construction of 3-sulfonated coumarins**

Wei Wei, Jiangwei Wen, Daoshan Yang, Mengyuan Guo, Yingying Wang, Jinmao You,  
Hua Wang\*

*The Key Laboratory of Life-Organic Analysis and Key Laboratory of Pharmaceutical  
Intermediates and Analysis of Natural Medicine, School of Chemistry and Chemical  
Engineering, Qufu Normal University, Qufu 273165, Shandong, China*

\*Phone: +86 537 4458317; Fax: +86 537 4458317.

E-mail: [huawang\\_qfnu@126.com](mailto:huawang_qfnu@126.com)

## Contents

|                                                                                                                              |         |
|------------------------------------------------------------------------------------------------------------------------------|---------|
| 1. General information .....                                                                                                 | S2      |
| 2. General procedure for direct arylsulfonation of alkynes with sulfonylhydrazides<br>leading to 3-sulfonated coumarins..... | S3      |
| 3. Preliminary mechanistic studies .....                                                                                     | S3      |
| 4. References.....                                                                                                           | S4      |
| 5. Characterization data of products <b>3a–3w</b> .....                                                                      | S5-S11  |
| 6. Copies of NMR spectra for <b>3a–3w</b> .....                                                                              | S12-S34 |

## 1. General information

All commercially available reagent grade chemicals were purchased from Aldrich, Acros, Alfa Aesar and Beijing Ouhe Chemical Company and used as received without further purification unless otherwise stated. Alkynoates were prepared according to previous literatures.<sup>[S1]</sup>  $^1\text{H}$  NMR and  $^{13}\text{C}$  NMR were recorded in  $\text{CDCl}_3$  on a Bruker Avance III 400 spectrometer with TMS as internal standard (400 MHz  $^1\text{H}$ , 100 MHz  $^{13}\text{C}$ ) at room temperature, the chemical shifts ( $\delta$ ) were expressed in ppm and  $J$  values were given in Hz. The following abbreviations are used to indicate the multiplicity: singlet (s), doublet (d), triplet (t), quartet (q), doublet of doublets (dd), doublet of triplets (dt), and multiplet (m). All first order splitting patterns were assigned on the basis of the appearance of the multiplet. Splitting patterns that could not be easily interpreted were designated as multiplet (m). Mass analyses and HRMS were obtained on a Finnigan-LCQDECA mass spectrometer and a Bruker Daltonics Bio-TOF-Q mass spectrometer by the ESI method, respectively. Column chromatography was performed on silica gel (200-300 mesh).

## 2. General procedure for metal-free direct arylsulfonylation of alkynes with sulfonylhydrazides leading to 3-sulfonated coumarins.

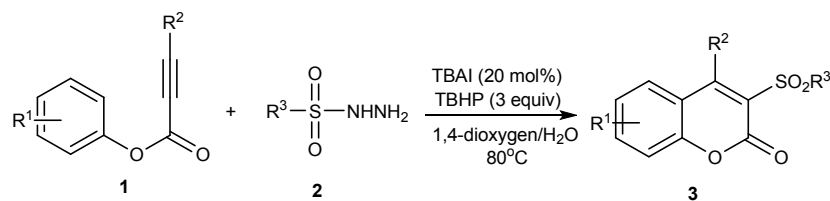

To a mixture of phenyl alkynoate **1a** (0.25 mmol), phenylsulfonylhydrazide **2a** (0.75 mmol), and (*n*-Bu)<sub>4</sub>Ni (20 mol%), TBHP (0.75 mmol) in a 25 mL round-bottomed flask at room temperature, was added the 1,4-dioxane/H<sub>2</sub>O (2.5 mL, 4/1). The reaction vessel was allowed to stir at 80 °C for 12-36 h. After the reaction, the solution was concentrated in vacuum. The resulting mixture purified by flash column chromatography using a mixture of petroleum ether and ethyl acetate as eluent to give the desired product **3**.

### 3. Preliminary mechanistic studies.

(1) The reaction of phenyl alkynoate **1a** under standard conditions.

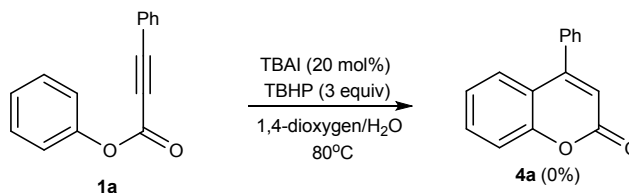

To a mixture of phenyl alkynoate **1a** (0.25 mmol), (*n*-Bu)<sub>4</sub>Ni (20 mol%), and TBHP (0.75 mmol) in a 25 mL round-bottomed flask at room temperature, was added the 1,4-dioxane/H<sub>2</sub>O (2.5 mL, 4/1). The reaction vessel was allowed to stir at 80 °C for 24 h. After the reaction, the solution was concentrated in vacuum, no desired product **4a** was detected.

(2) The reaction of preformed coumarin **4a**<sup>[S2]</sup> with phenylsulfonylhydrazide **2a** under standard conditions.

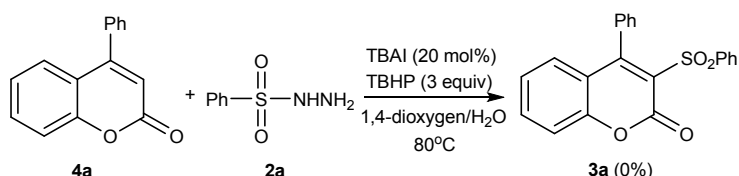

To a mixture of coumarin **4a** (0.25 mmol), phenylsulfonohydrazide **2a** (0.75 mmol), (*n*-Bu)<sub>4</sub>NI (20 mol%), and TBHP (0.75 mmol) in a 25 mL round-bottomed flask at room temperature, was added the 1,4-dioxane/H<sub>2</sub>O (2.5 mL, 4/1). The reaction vessel was allowed to stir at 80 °C for 24 h. After the reaction, the solution was concentrated in vacuum, no desired product **3a** was detected.

(3) The reaction of **1a** and **2a** with TEMPO under the standard conditions.

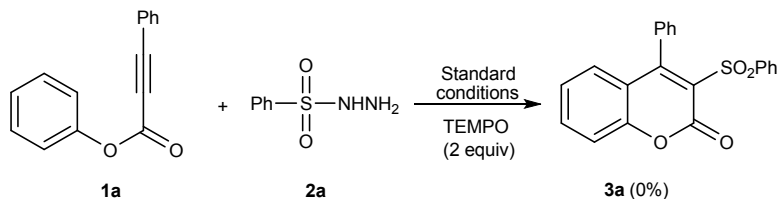

To a mixture of phenyl alkynoate **1a** (0.25 mmol), phenylsulfonohydrazide **2a** (0.75 mmol), (*n*-Bu)<sub>4</sub>NI (20 mol%), TBHP (0.75 mmol), and TEMPO (0.5 mmol) in a 25 mL round-bottomed flask at room temperature, was added the 1,4-dioxane/H<sub>2</sub>O (2.5 mL, 4/1). The reaction vessel was allowed to stir at 80 °C for 24 h. After the reaction, the solution was concentrated in vacuum, no desired product **3a** was detected.

#### 4. Reference

- [1] C. E. Song, D-U. Jung, S. Y. Choung, E. J. Roh and S.-G. Lee, *Angew. Chem., Int. Ed.*, 2004, 43, 6183-6185.
- [2] (a) M. Khoobi, M. Alipour, S. Zarei, F. Jafarpour and A. Shafiee, *Chem. Commun.*, 2012, 48, 2985-2987; (b) Y. Li, Z. Qi, H. Wang, X.Fu and C. Duan, *J. Org. Chem.* 2012, 77, 2053–2057.

## 5. Characterization data of sulfonated coumarins (3a-3w)

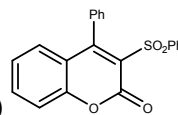

### 4-phenyl-3-(phenylsulfonyl)-2H-chromen-2-one (3a)

Compound **3a** was obtained in 88% yield according to the general procedure (12h). <sup>1</sup>H NMR (CDCl<sub>3</sub>, 400 MHz, ppm): δ 8.03 (t, *J* = 8.7 Hz, 2H), 7.66-7.60 (m, 5H), 7.53 (t, *J* = 8.0 Hz, 2H), 7.39-7.35 (m, 3H), 7.22 (t, *J* = 8.7 Hz, 1H), 7.05 (dd, *J*<sub>1</sub> = 1.4 Hz, *J*<sub>2</sub> = 8.1 Hz, 1H); <sup>13</sup>C NMR (CDCl<sub>3</sub>, 100 MHz, ppm): δ 159.5, 155.6, 153.9, 140.3, 134.7, 133.7, 132.6, 130.0, 129.3, 129.2, 128.6, 128.2, 127.5, 125.9, 124.8, 120.3, 116.8; HRMS calc. for C<sub>21</sub>H<sub>14</sub>O<sub>4</sub>SNa (M+Na)<sup>+</sup>, 385.0510; found, 385.0513.

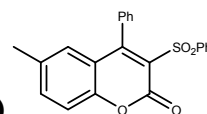

### 6-methyl-4-phenyl-3-(phenylsulfonyl)-2H-chromen-2-one (3b)

Compound **3b** was obtained in 84% yield according to the general procedure (12h). <sup>1</sup>H NMR (CDCl<sub>3</sub>, 400 MHz, ppm): δ 8.02 (d, *J* = 7.4 Hz, 2H), 7.63-7.59 (m, 4H), 7.52 (t, *J* = 7.9 Hz, 2H), 7.37-7.35 (m, 2H), 7.17 (s, 1H), 7.02 (d, *J* = 8.3 Hz, 1H), 6.91 (d, *J* = 8.3 Hz, 1H), 2.46 (s, 3H); <sup>13</sup>C NMR (CDCl<sub>3</sub>, 100 MHz, ppm): δ 159.6, 155.8, 154.1, 146.8, 140.4, 133.6, 132.8, 129.7, 129.2, 129.1, 128.6, 128.1, 127.5, 126.2, 124.7, 117.9, 116.9, 21.9; HRMS calc. for C<sub>22</sub>H<sub>16</sub>O<sub>4</sub>SNa (M+Na)<sup>+</sup>, 399.0667; found, 399.0665.

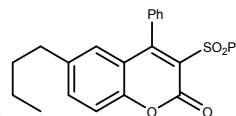

### 6-butyl-4-phenyl-3-(phenylsulfonyl)-2H-chromen-2-one (3c)

Compound **3c** was obtained in 89% yield according to the general procedure (24h). <sup>1</sup>H NMR (CDCl<sub>3</sub>, 400 MHz, ppm): δ 8.02 (d, *J* = 7.2 Hz, 2H), 7.61-7.59 (m, 4H), 7.51 (t, *J* = 7.9 Hz, 2H), 7.37-7.35 (m, 2H), 7.17 (d, *J* = 1.2 Hz, 1H), 7.02 (dd, *J*<sub>1</sub> = 1.5 Hz, *J*<sub>2</sub> = 8.4 Hz, 1H), 6.93 (d, *J* = 8.3 Hz, 1H), 2.70 (t, *J* = 7.6 Hz, 2H), 1.63-1.59 (m, 2H), 1.38-1.28 (m, 2H), 0.93 (t, *J* = 7.3 Hz, 3H); <sup>13</sup>C NMR (CDCl<sub>3</sub>, 100 MHz, ppm): δ 159.7, 155.9, 154.1, 151.8, 140.4, 133.6, 132.8, 129.7, 129.2, 129.1, 128.6, 128.1, 127.5, 125.5, 124.7, 118.0, 116.2, 35.7, 32.8, 22.2, 13.8; HRMS calc. for C<sub>25</sub>H<sub>22</sub>O<sub>4</sub>SNa (M+Na)<sup>+</sup>, 441.1136; found, 441.1137.

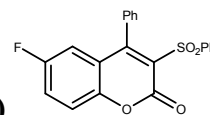

**6-fluoro-4-phenyl-3-(phenylsulfonyl)-2H-chromen-2-one (3d)**

Compound **3d** was obtained in 94% yield according to the general procedure (24h). <sup>1</sup>H NMR (CDCl<sub>3</sub>, 400 MHz, ppm): δ 8.01(d, *J* = 7.6 Hz, 2H), 7.64-7.60 (m, 4H), 7.52 (t, *J* = 7.8 Hz, 2H), 7.36 (t, *J* = 3.4 Hz, 2H), 7.09-7.04 (m, 2H), 6.97-6.92 (m, 1H); <sup>13</sup>C NMR (CDCl<sub>3</sub>, 100 MHz, ppm): δ 166.1 (d, *J* = 258.1 Hz), 159.1, 155.3, 155.2 (d, *J* = 13.4 Hz), 140.1, 133.8, 132.4, 132.3, 129.5, 129.2, 128.7, 128.3, 127.4, 124.9, 117.0 (d, *J* = 2.6 Hz), 113.3 (d, *J* = 22.5 Hz), 104.2 (d, *J* = 25.5 Hz); HRMS calc. for C<sub>21</sub>H<sub>13</sub>FO<sub>4</sub>SNa (M+Na)<sup>+</sup>, 403.0416; found, 403.0414.

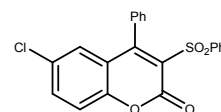

**6-chloro-4-phenyl-3-(phenylsulfonyl)-2H-chromen-2-one (3e)**

Compound **3e** was obtained in 85% yield according to the general procedure (24h). <sup>1</sup>H NMR (CDCl<sub>3</sub>, 400 MHz, ppm): δ 8.02 (d, *J* = 7.5 Hz, 2H), 7.64-7.61 (m, 4H), 7.54 (t, *J* = 7.9 Hz, 2H), 7.38-7.34 (m, 3H), 7.18 (dd, *J*<sub>1</sub> = 2.0 Hz, *J*<sub>2</sub> = 8.7 Hz, 1H), 6.97 (d, *J* = 8.7 Hz, 1H); <sup>13</sup>C NMR (CDCl<sub>3</sub>, 150 MHz, ppm): δ 158.8, 155.0, 154.1, 141.1, 140.1, 133.8, 132.2, 130.9, 129.5, 129.2, 128.7, 128.3, 127.4, 125.9, 125.6, 118.9, 117.0; HRMS calc. for C<sub>21</sub>H<sub>13</sub>ClO<sub>4</sub>SNa (M+Na)<sup>+</sup>, 419.0121; found, 419.0120.

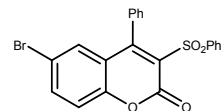

**6-bromo-4-phenyl-3-(phenylsulfonyl)-2H-chromen-2-one (3f)**

Compound **3f** was obtained in 74% yield according to the general procedure (24h). <sup>1</sup>H NMR (CDCl<sub>3</sub>, 400 MHz, ppm): δ 8.01 (d, *J* = 7.4 Hz, 2H), 7.63-7.61 (m, 4H), 7.57-7.52 (m, 3H), 7.36-7.32 (m, 3H), 6.89 (d, *J* = 8.7 Hz, 1H); <sup>13</sup>C NMR (CDCl<sub>3</sub>, 100 MHz, ppm): δ 158.9, 154.9, 153.9, 140.0, 133.8, 132.1, 130.9, 129.5, 129.4, 129.2, 128.7, 128.4, 128.3, 127.4, 126.1, 120.1, 119.3; HRMS calc. for C<sub>21</sub>H<sub>14</sub>BrO<sub>4</sub>S (M+H)<sup>+</sup>, 440.9800; found, 440.9796.

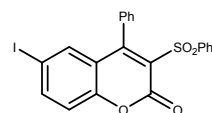

**6-iodo-4-phenyl-3-(phenylsulfonyl)-2H-chromen-2-one (3g)**

Compound **3g** was obtained in 80% yield according to the general procedure (24h). <sup>1</sup>H NMR (CDCl<sub>3</sub>, 400 MHz, ppm): δ 8.01 (d, *J* = 7.6 Hz, 2H), 7.75 (s, 1H), 7.63-7.60 (m,

4H), 7.53 (t,  $J = 8.0$  Hz, 3H), 7.36-7.34 (m, 2H), 6.71 (d,  $J = 8.6$  Hz, 1H);  $^{13}\text{C}$  NMR ( $\text{CDCl}_3$ , 100 MHz, ppm):  $\delta$  159.0, 154.8, 153.4, 140.0, 134.3, 133.8, 132.1, 130.6, 129.5, 129.2, 128.7, 128.3, 127.4, 126.3, 126.0, 119.8, 101.6; HRMS calc. for  $\text{C}_{21}\text{H}_{13}\text{IO}_4\text{SNa}$  ( $\text{M}+\text{Na}$ ) $^+$ , 510.9477; found, 510.9475.

#### 4-phenyl-3-(phenylsulfonyl)-6-(trifluoromethyl)-2H-chromen-2-one (3h)

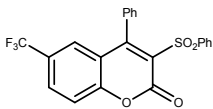

Compound **3h** was obtained in 78% yield according to the general procedure (24h).  $^1\text{H}$  NMR ( $\text{CDCl}_3$ , 400 MHz, ppm):  $\delta$  8.02 (d,  $J = 7.3$  Hz, 2H), 7.65-7.62 (m, 5H), 7.55 (t,  $J = 8.0$  Hz, 2H), 7.44 (d,  $J = 8.5$  Hz, 1H), 7.38-7.36 (m, 2H), 7.19 (d,  $J = 8.4$  Hz, 1H);  $^{13}\text{C}$  NMR ( $\text{CDCl}_3$ , 100 MHz, ppm):  $\delta$  158.2, 154.7, 153.5, 139.7, 135.8 (d,  $J = 33.7$  Hz), 134.0, 131.8, 130.9, 129.7, 129.0, 128.8, 128.5, 127.4, 124.1, 122.9, 121.2 (d,  $J = 3.6$  Hz), 114.2 (d,  $J = 4.0$  Hz); HRMS calc. for  $\text{C}_{22}\text{H}_{13}\text{F}_3\text{O}_4\text{SNa}$  ( $\text{M}+\text{Na}$ ) $^+$ , 453.0384; found, 453.0390.

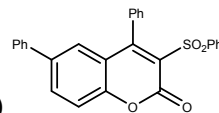

#### 4,6-diphenyl-3-(phenylsulfonyl)-2H-chromen-2-one (3i)

Compound **3i** was obtained in 73% yield according to the general procedure (24h).  $^1\text{H}$  NMR ( $\text{CDCl}_3$ , 400 MHz, ppm):  $\delta$  8.05 (d,  $J = 7.4$  Hz, 2H), 7.65-7.61 (m, 5H), 7.58-7.40 (m, 10H), 7.10 (d,  $J = 8.4$  Hz, 1H);  $^{13}\text{C}$  NMR ( $\text{CDCl}_3$ , 100 MHz, ppm):  $\delta$  159.4, 155.7, 154.4, 147.9, 140.4, 138.3, 133.6, 132.7, 131.5, 130.9, 130.3, 129.3, 129.2, 128.6, 128.2, 127.5, 127.3, 125.3, 123.6, 119.1, 114.7; HRMS calc. for  $\text{C}_{27}\text{H}_{18}\text{O}_4\text{SNa}$  ( $\text{M}+\text{Na}$ ) $^+$ , 461.0823; found, 461.0821.

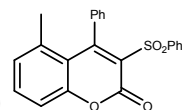

#### 5-methyl-4-phenyl-3-(phenylsulfonyl)-2H-chromen-2-one (3k)

Compound **3k** was obtained in 40% yield according to the general procedure (24h).  $^1\text{H}$  NMR ( $\text{CDCl}_3$ , 400 MHz, ppm):  $\delta$  8.03 (d,  $J = 7.2$  Hz, 2H), 7.61-7.58 (m, 4H), 7.54-7.47 (m, 3H), 7.37-7.35 (m, 2H), 7.10 (t,  $J = 7.9$  Hz, 1H), 6.87 (t,  $J = 8.1$  Hz, 1H), 2.45 (s, 3H);  $^{13}\text{C}$  NMR ( $\text{CDCl}_3$ , 100 MHz, ppm):  $\delta$  159.9, 155.7, 152.3, 140.4, 135.9, 133.6, 132.9, 129.2, 128.6, 128.1, 127.7, 127.5, 126.4, 125.6, 124.3, 120.0, 116.3, 15.4; HRMS calc.

for  $C_{22}H_{16}O_4SNa$  ( $M+Na$ )<sup>+</sup>, 399.0667; found, 399.0667.

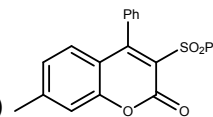

**7-methyl-4-phenyl-3-(phenylsulfonyl)-2H-chromen-2-one (3k')**

Compound **3k'** was obtained in 44% yield according to the general procedure (24h). <sup>1</sup>H NMR ( $CDCl_3$ , 400 MHz, ppm):  $\delta$  8.04-8.01 (m, 2H), 7.63-7.60 (m, 4H), 7.52 (t,  $J = 7.9$  Hz, 2H), 7.44 (dd,  $J_1 = 1.7$  Hz,  $J_2 = 8.4$  Hz, 1H), 7.38-7.35 (m, 2H), 7.26 (d,  $J = 8.4$  Hz, 1H), 6.79 (s, 1H); <sup>13</sup>C NMR ( $CDCl_3$ , 100 MHz, ppm):  $\delta$  159.6, 155.8, 152.1, 140.4, 135.9, 134.7, 133.6, 132.6, 129.4, 129.2, 129.1, 128.6, 128.2, 127.5, 125.8, 119.9, 116.6, 20.9; HRMS calc. for  $C_{22}H_{16}O_4SNa$  ( $M+Na$ )<sup>+</sup>, 399.0667; found, 399.0666.

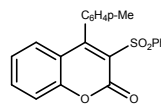

**3-(phenylsulfonyl)-4-p-tolyl-2H-chromen-2-one (3l)**

Compound **3l** was obtained in 86% yield according to the general procedure (6h). <sup>1</sup>H NMR ( $CDCl_3$ , 400 MHz, ppm):  $\delta$  8.03 (d,  $J = 7.6$  Hz, 2H), 7.64-7.60 (m, 2H), 7.52 (t,  $J = 7.8$  Hz, 2H), 7.41 (d,  $J = 7.7$  Hz, 2H), 7.38-7.34 (m, 1H), 7.29-7.25 (m, 2H), 7.21 (t,  $J = 7.7$  Hz, 1H), 7.11 (t,  $J = 6.6$  Hz, 1H), 2.52 (s, 3H); <sup>13</sup>C NMR ( $CDCl_3$ , 100 MHz, ppm):  $\delta$  160.0, 155.6, 153.9, 140.4, 139.3, 134.6, 133.6, 130.0, 129.5, 129.1, 128.9, 128.6, 127.5, 125.9, 124.8, 120.4, 116.8, 21.6; HRMS calc. for  $C_{22}H_{17}O_4S$  ( $M+H$ )<sup>+</sup>, 377.0848; found, 377.0848.

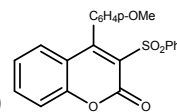

**4-(4-methoxyphenyl)-3-(phenylsulfonyl)-2H-chromen-2-one (3m)**

Compound **3m** was obtained in 71% yield according to the general procedure (24h). <sup>1</sup>H NMR ( $CDCl_3$ , 400 MHz, ppm):  $\delta$  8.01 (d,  $J = 7.4$  Hz, 2H), 7.65-7.59 (m, 2H), 7.52 (t,  $J = 8.0$  Hz, 2H), 7.37-7.35 (m, 1H), 7.31-7.29 (m, 2H), 7.22 (t,  $J = 8.0$  Hz, 1H), 7.17-7.11 (m, 3H), 3.95 (s, 3H); <sup>13</sup>C NMR ( $CDCl_3$ , 100 MHz, ppm):  $\delta$  160.5, 159.7, 155.7, 153.9, 140.5, 134.5, 133.6, 130.9, 130.0, 129.2, 129.1, 128.6, 124.8, 124.3, 120.5, 116.8, 113.7, 55.4; HRMS calc. for  $C_{22}H_{16}O_5SNa$  ( $M+Na$ )<sup>+</sup>, 415.0616; found, 415.0619.

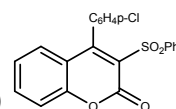

**4-(4-chlorophenyl)-3-(phenylsulfonyl)-2H-chromen-2-one (3n)**

Compound **3n** was obtained in 87% yield according to the general procedure (24h). <sup>1</sup>H



NMR (CDCl<sub>3</sub>, 400 MHz, ppm):  $\delta$  8.02 (d,  $J$  = 7.4 Hz, 2H), 7.68-7.58 (m, 4H), 7.54 (t,  $J$  = 7.9 Hz, 2H), 7.37 (d,  $J$  = 7.8 Hz, 1H), 7.32 (d,  $J$  = 8.4 Hz, 2H), 7.24 (t,  $J$  = 8.2 Hz, 1H), 7.04 (dd,  $J_1$  = 1.4 Hz,  $J_2$  = 8.1 Hz, 1H); <sup>13</sup>C NMR (CDCl<sub>3</sub>, 100 MHz, ppm):  $\delta$  158.3, 155.3, 153.9, 140.0, 135.6, 134.9, 133.8, 130.9, 129.6, 129.2, 128.9, 128.7, 128.6, 126.3, 125.0, 119.9, 117.0; HRMS calc. for C<sub>21</sub>H<sub>13</sub>ClO<sub>4</sub>SNa (M+Na)<sup>+</sup>, 419.0121; found, 419.0120.

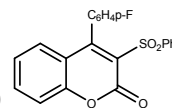

**4-(4-fluorophenyl)-3-(phenylsulfonyl)-2H-chromen-2-one (3o)**

Compound **3o** was obtained in 91% yield according to the general procedure (24h). <sup>1</sup>H NMR (CDCl<sub>3</sub>, 400 MHz, ppm):  $\delta$  8.01 (d,  $J$  = 7.3 Hz, 2H), 7.68-7.61 (m, 2H), 7.53 (t,  $J$  = 8.0 Hz, 2H), 7.38-7.31 (m, 5H), 7.24 (d,  $J$  = 8.1 Hz, 1H), 7.06 (dd,  $J_1$  = 1.4 Hz,  $J_2$  = 8.2 Hz, 1H); <sup>13</sup>C NMR (CDCl<sub>3</sub>, 100 MHz, ppm):  $\delta$  163.3 (d,  $J$  = 248.1 Hz), 158.6, 155.4, 153.9, 140.1, 134.8, 133.8, 129.7, 129.5 (d,  $J$  = 8.3 Hz), 129.1, 128.7, 128.3 (d,  $J$  = 3.7 Hz), 126.4, 125.0, 120.1, 117.0, 115.6 (d,  $J$  = 22.0 Hz); HRMS calc. for C<sub>21</sub>H<sub>13</sub>FO<sub>4</sub>SNa (M+Na)<sup>+</sup>, 403.0416; found, 403.0416.

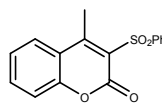

**4-methyl-3-(phenylsulfonyl)-2H-chromen-2-one (3p)**

Compound **3p** was obtained in 60% yield according to the general procedure. <sup>1</sup>H NMR (CDCl<sub>3</sub>, 400 MHz, ppm):  $\delta$  8.13 (d,  $J$  = 7.3 Hz, 2H), 7.93 (dd,  $J_1$  = 1.3 Hz,  $J_2$  = 8.2 Hz, 1H), 7.69-7.62 (m, 2H), 7.56 (t,  $J$  = 7.9 Hz, 2H), 7.43-7.39 (m, 1H), 7.32 (dd,  $J_1$  = 0.9 Hz,  $J_2$  = 8.3 Hz, 1H), 3.19 (s, 3H); <sup>13</sup>C NMR (CDCl<sub>3</sub>, 100 MHz, ppm):  $\delta$  158.3, 155.3, 153.4, 140.8, 134.6, 133.7, 128.7, 128.6, 126.6, 125.0, 119.7, 117.3, 15.3; HRMS calc. for C<sub>16</sub>H<sub>12</sub>O<sub>4</sub>SNa (M+Na)<sup>+</sup>, 323.0354; found, 323.0356.

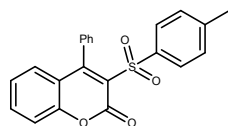

**4-phenyl-3-tosyl-2H-chromen-2-one (3q)**

Compound **3q** was obtained in 84% yield according to the general procedure. <sup>1</sup>H NMR (CDCl<sub>3</sub>, 400 MHz, ppm):  $\delta$  7.91 (d,  $J$  = 8.3 Hz, 2H), 7.65-7.59 (m, 4H), 7.38-7.35 (m, 3H), 7.32 (d,  $J$  = 8.0 Hz, 2H), 7.23-7.19 (m, 1H), 7.04 (dd,  $J_1$  = 1.4 Hz,  $J_2$  = 8.1 Hz, 1H), 2.44 (s, 3H); <sup>13</sup>C NMR (CDCl<sub>3</sub>, 100 MHz, ppm):  $\delta$  159.2, 155.6, 153.9, 144.8, 137.3,

134.6, 132.7, 129.9, 129.3, 129.2, 128.2, 127.5, 126.2, 124.7, 120.3, 116.8, 21.7; HRMS calc. for C<sub>22</sub>H<sub>16</sub>O<sub>4</sub>SNa (M+Na)<sup>+</sup>, 399.0667; found, 399.0669.

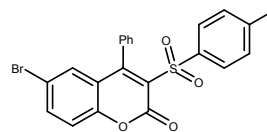

**6-bromo-4-phenyl-3-tosyl-2H-chromen-2-one (3r)**

Compound **3r** was obtained in 78% yield according to the general procedure. <sup>1</sup>H NMR (CDCl<sub>3</sub>, 400 MHz, ppm): δ 7.89 (d, *J* = 8.2 Hz, 2H), 7.61 (t, *J* = 3.2 Hz, 3H), 7.54 (d, *J* = 1.6 Hz, 1H), 7.35-7.31 (m, 5H), 6.88 (d, *J* = 8.7 Hz, 1H), 2.44 (s, 3H); <sup>13</sup>C NMR (CDCl<sub>3</sub>, 100 MHz, ppm): δ 158.5, 155.0, 153.8, 145.0, 137.0, 132.3, 130.8, 129.5, 129.4, 129.3, 129.2, 128.4, 128.3, 127.4, 126.4, 120.0, 119.3, 21.7; HRMS calc. for C<sub>22</sub>H<sub>15</sub>BrO<sub>4</sub>SNa (M+Na)<sup>+</sup>, 476.9772; found, 476.9775.

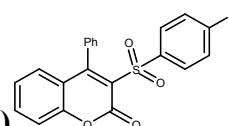

**3-(4-fluorophenylsulfonyl)-4-phenyl-2H-chromen-2-one (3s)**

Compound **3s** was obtained in 74% yield according to the general procedure. <sup>1</sup>H NMR (CDCl<sub>3</sub>, 400 MHz, ppm): δ 8.07-8.04 (m, 2H), 7.67-7.59 (m, 4H), 7.23-7.17 (m, 3H), 7.25-7.17 (m, 3H), 7.06 (dd, *J*<sub>1</sub> = 1.4 Hz, *J*<sub>2</sub> = 8.2 Hz, 1H); <sup>13</sup>C NMR (CDCl<sub>3</sub>, 100 MHz, ppm): δ 165.9 (d, *J* = 254.9 Hz), 159.6, 155.6, 153.9, 136.2 (d, *J* = 3.1 Hz), 134.8, 132.5, 132.3, 132.2, 129.7 (d, *J* = 62.4 Hz), 128.2, 127.4, 125.8, 124.9, 120.2, 116.9, 115.9 (d, *J* = 22.6 Hz); HRMS calc. for C<sub>21</sub>H<sub>13</sub>FO<sub>4</sub>SNa (M+Na)<sup>+</sup>, 403.0416; found, 403.0418.

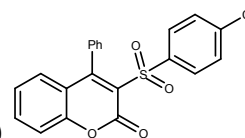

**3-(4-chlorophenylsulfonyl)-4-phenyl-2H-chromen-2-one (3t)**

Compound **3t** was obtained in 77% yield according to the general procedure. <sup>1</sup>H NMR (CDCl<sub>3</sub>, 400 MHz, ppm): δ 7.96 (d, *J* = 8.7 Hz, 2H), 7.66-7.60 (m, 4H), 7.49 (d, *J* = 8.7 Hz, 2H), 7.39-7.35 (m, 3H), 7.25-7.21 (m, 1H) 7.06 (dd, *J*<sub>1</sub> = 1.4 Hz, *J*<sub>2</sub> = 8.2 Hz, 1H); <sup>13</sup>C NMR (CDCl<sub>3</sub>, 100 MHz, ppm): δ 159.9, 155.6, 153.9, 140.5, 138.7, 134.9, 132.4, 130.8, 130.0, 129.4, 129.0, 128.3, 127.4, 125.6, 125.0, 120.2, 116.9; HRMS calc. for C<sub>21</sub>H<sub>13</sub>ClO<sub>4</sub>SNa (M+Na)<sup>+</sup>, 419.0121; found, 419.0120.

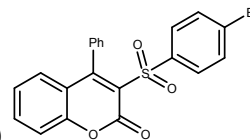

### 3-(4-bromophenylsulfonyl)-4-phenyl-2H-chromen-2-one (3u)

Compound **3u** was obtained in 71% yield according to the general procedure. <sup>1</sup>H NMR (CDCl<sub>3</sub>, 400 MHz, ppm): δ 7.89 (d, *J* = 8.7 Hz, 2H), 7.68-7.60 (m, 6H), 7.39-7.35 (m, 3H), 7.25-7.21 (m, 1H), 7.06 (dd, *J*<sub>1</sub> = 1.5 Hz, *J*<sub>2</sub> = 8.2 Hz, 1H); <sup>13</sup>C NMR (CDCl<sub>3</sub>, 100 MHz, ppm): δ 159.9, 155.6, 153.9, 139.2, 134.9, 132.4, 132.0, 130.8, 130.0, 129.4, 129.2, 128.3, 127.4, 125.6, 125.0, 120.2, 116.9; HRMS calc. for C<sub>21</sub>H<sub>13</sub>BrO<sub>4</sub>SNa (M+Na)<sup>+</sup>, 462.9616; found, 462.9613.

### 4-phenyl-3-(2-(trifluoromethyl)phenylsulfonyl)-2H-chromen-2-one (3v)

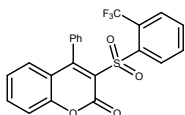

Compound **3v** was obtained in 86% yield according to the general procedure. <sup>1</sup>H NMR (CDCl<sub>3</sub>, 400 MHz, ppm): δ 8.54 (d, *J* = 8.0 Hz, 1H), 7.82-7.79 (m, 2H), 7.72 (t, *J* = 7.0 Hz, 1H), 7.69-7.64 (m, 1H), 7.60-7.58 (m, 3H), 7.47-7.45 (m, 2H), 7.39 (dd, *J*<sub>1</sub> = 0.8 Hz, *J*<sub>2</sub> = 8.3 Hz, 1H), 7.29-7.25 (m, 1H), 7.19 (dd, *J*<sub>1</sub> = 1.6 Hz, *J*<sub>2</sub> = 8.2 Hz, 1H); <sup>13</sup>C NMR (CDCl<sub>3</sub>, 100 MHz, ppm): δ 158.8, 155.7, 153.8, 139.8, 134.6, 133.4, 133.2, 132.1, 131.6, 129.7 (d, *J* = 4.2 Hz), 128.2, 128.1, 127.7 (q, *J* = 6.4 Hz), 127.5, 126.4, 125.0, 123.0 (d, *J* = 285 Hz), 120.0, 117.0; HRMS calc. for C<sub>22</sub>H<sub>13</sub>F<sub>3</sub>O<sub>4</sub>SNa (M+Na)<sup>+</sup>, 453.0384; found, 453.0381.

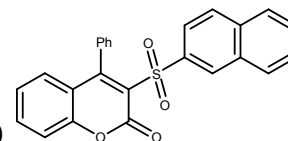

### 3-(naphthalen-2-ylsulfonyl)-4-phenyl-2H-chromen-2-one (3w)

Compound **3w** was obtained in 78% yield according to the general procedure. <sup>1</sup>H NMR (CDCl<sub>3</sub>, 400 MHz, ppm): δ 8.63 (s, 1H), 8.01 (d, *J* = 7.9 Hz, 1H), 7.95 (s, 2H), 7.91 (d, *J* = 8.1 Hz, 1H), 7.68-7.60 (m, 6H), 7.43-7.40 (m, 2H), 7.35 (d, *J* = 8.2 Hz, 1H), 7.22 (t, *J* = 8.0 Hz, 1H), 7.07 (d, *J* = 8.1 Hz, 1H); <sup>13</sup>C NMR (CDCl<sub>3</sub>, 100 MHz, ppm): δ 159.5, 155.6, 153.9, 137.1, 135.4, 134.7, 132.6, 132.0, 131.4, 129.9, 129.7, 129.4, 129.3, 128.7, 128.2, 127.9, 127.6, 127.4, 126.1, 124.8, 123.6, 120.3, 116.8; HRMS calc. for C<sub>25</sub>H<sub>16</sub>O<sub>4</sub>SNa (M+Na)<sup>+</sup>, 435.0667; found, 435.0669.



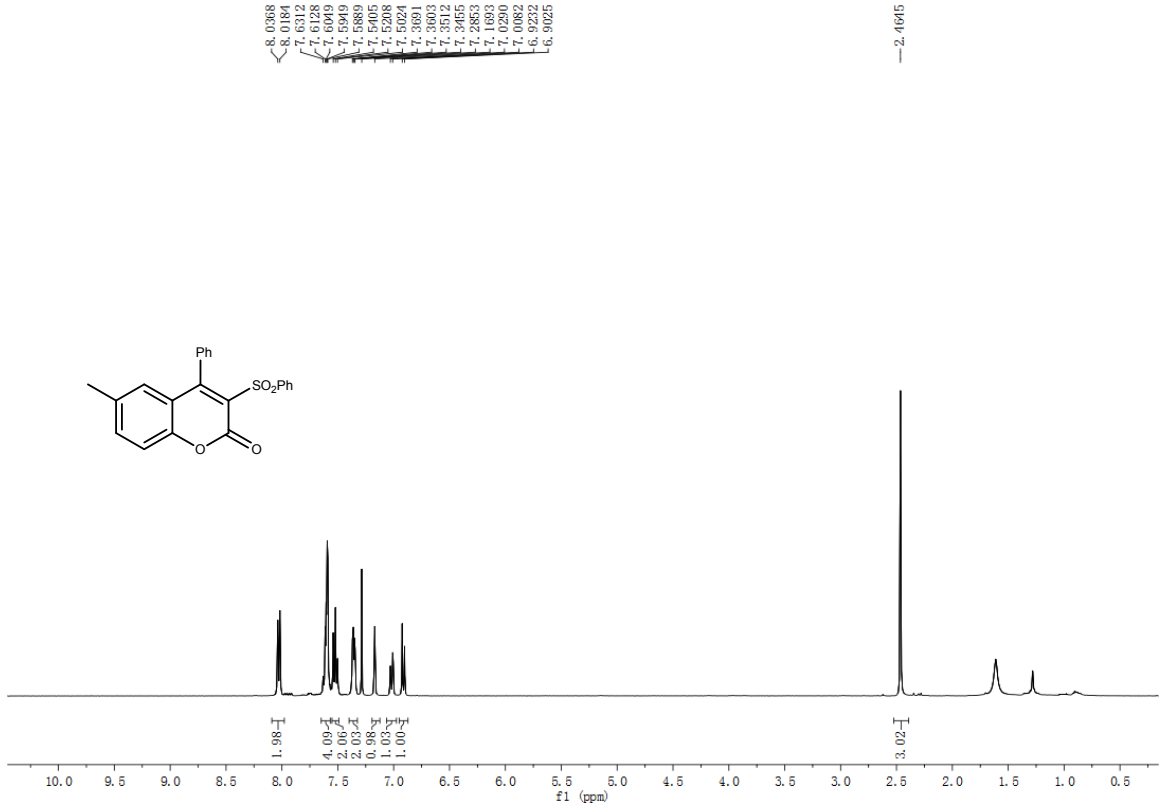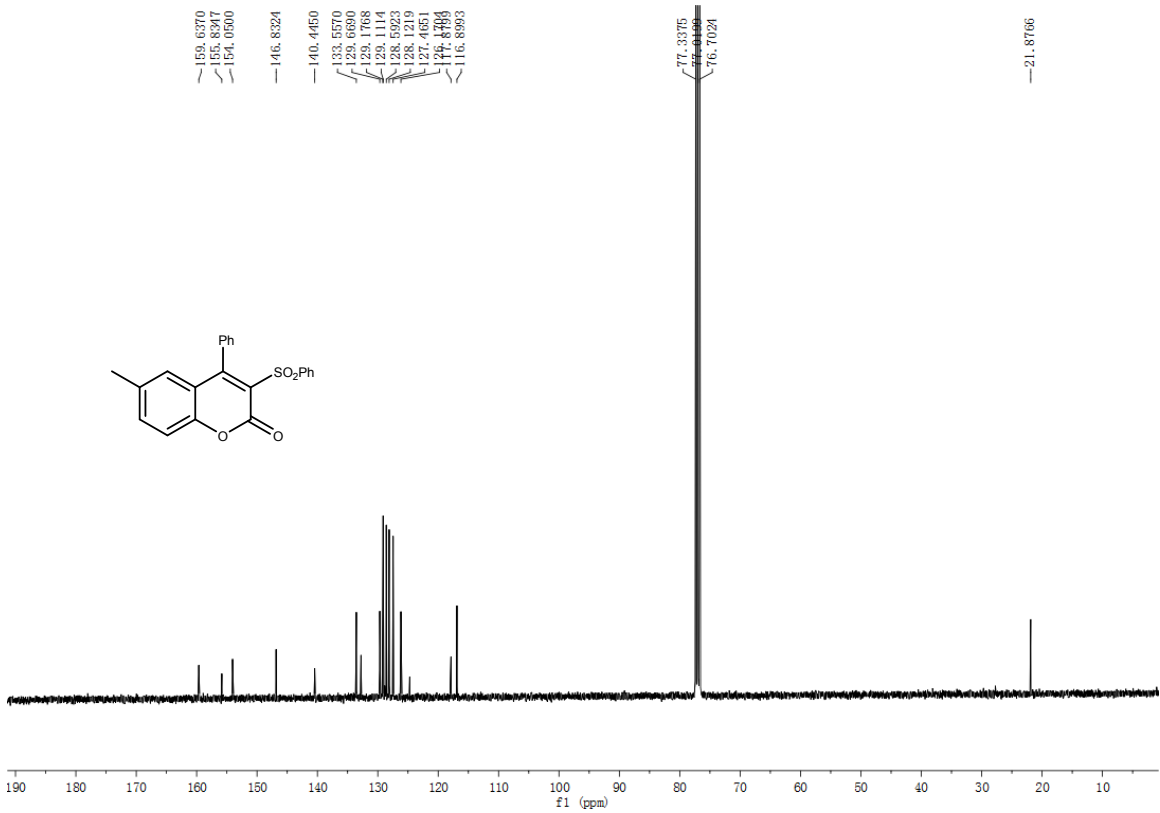

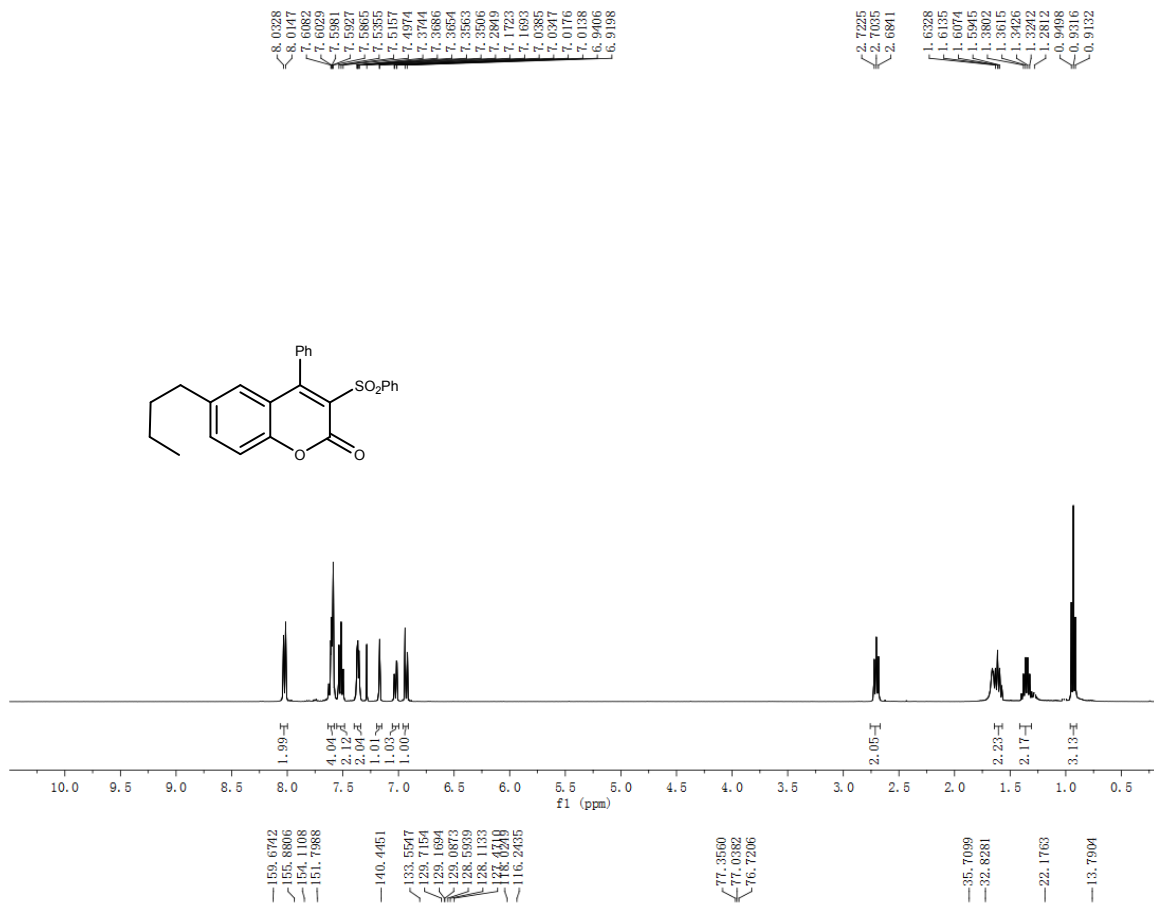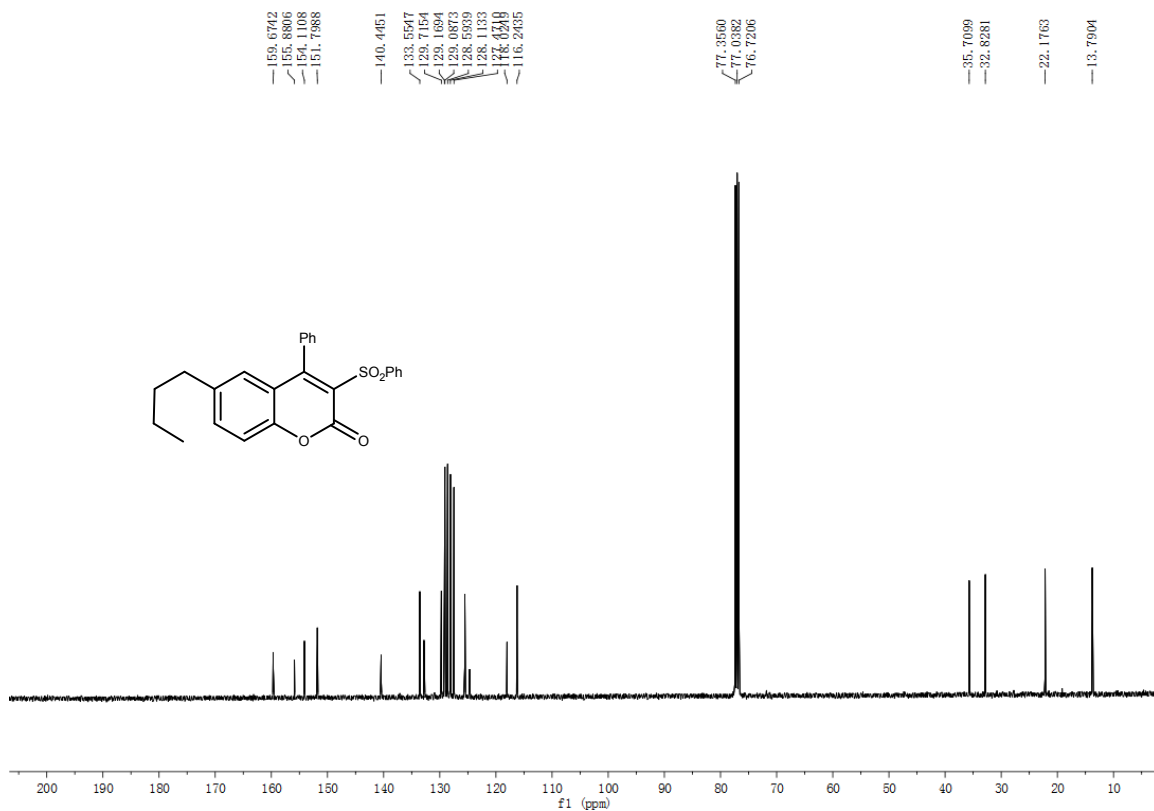

8.0254  
7.6116  
7.6170  
7.6075  
7.6023  
7.5955  
7.5971  
7.5072  
7.5088  
7.5089  
7.5098  
7.2852  
7.0901  
7.0845  
7.0754  
7.0889  
7.0821  
7.0833  
7.0833  
5.9685  
5.9688  
5.9444  
5.9212  
5.9186

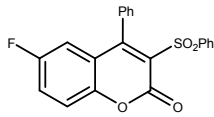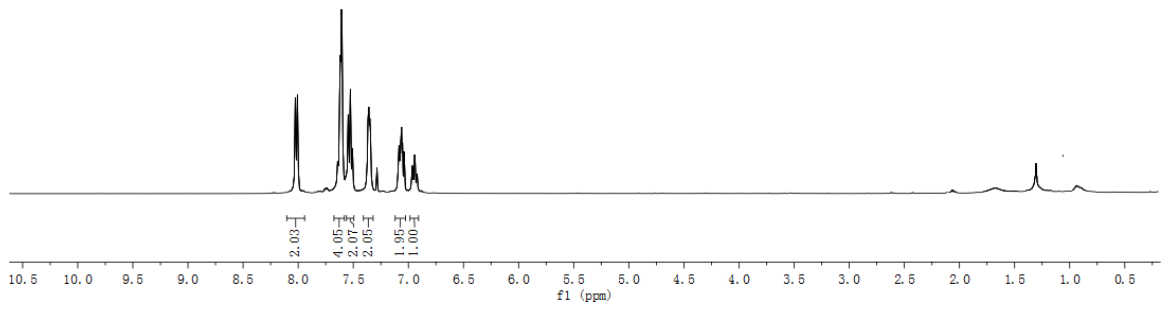

167.4209  
164.8389  
158.0535  
156.3426  
156.2872  
156.2862  
140.1407  
135.7896  
134.4826  
129.4823  
129.1553  
128.6915  
128.3126  
127.8883  
117.0827  
113.3911  
113.1663  
104.4489  
104.1938  
77.3805  
77.0627  
76.7149

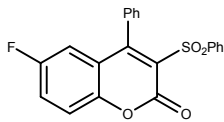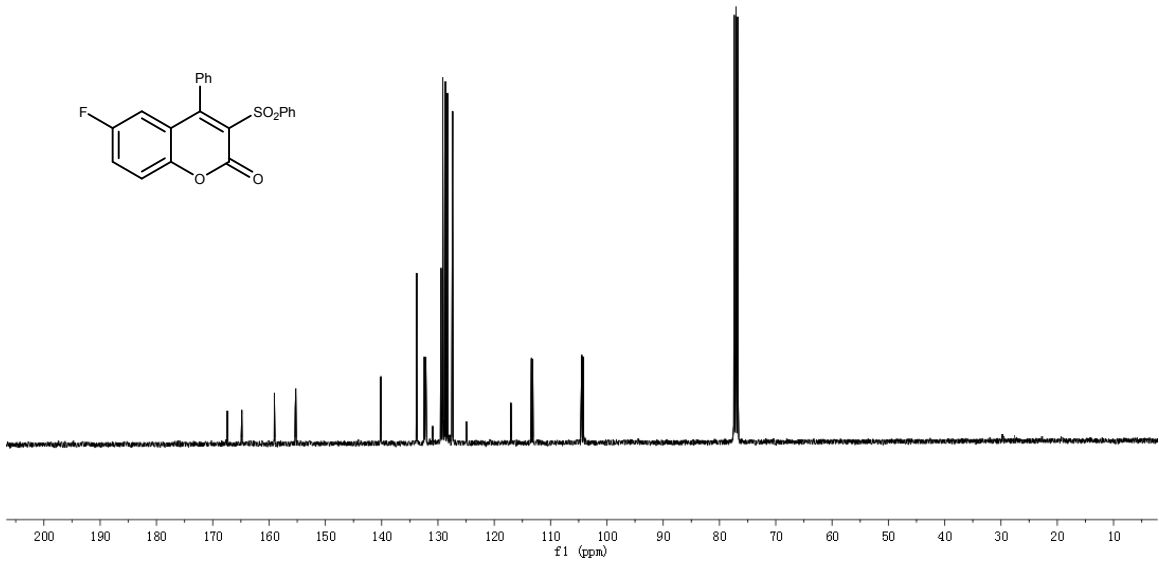

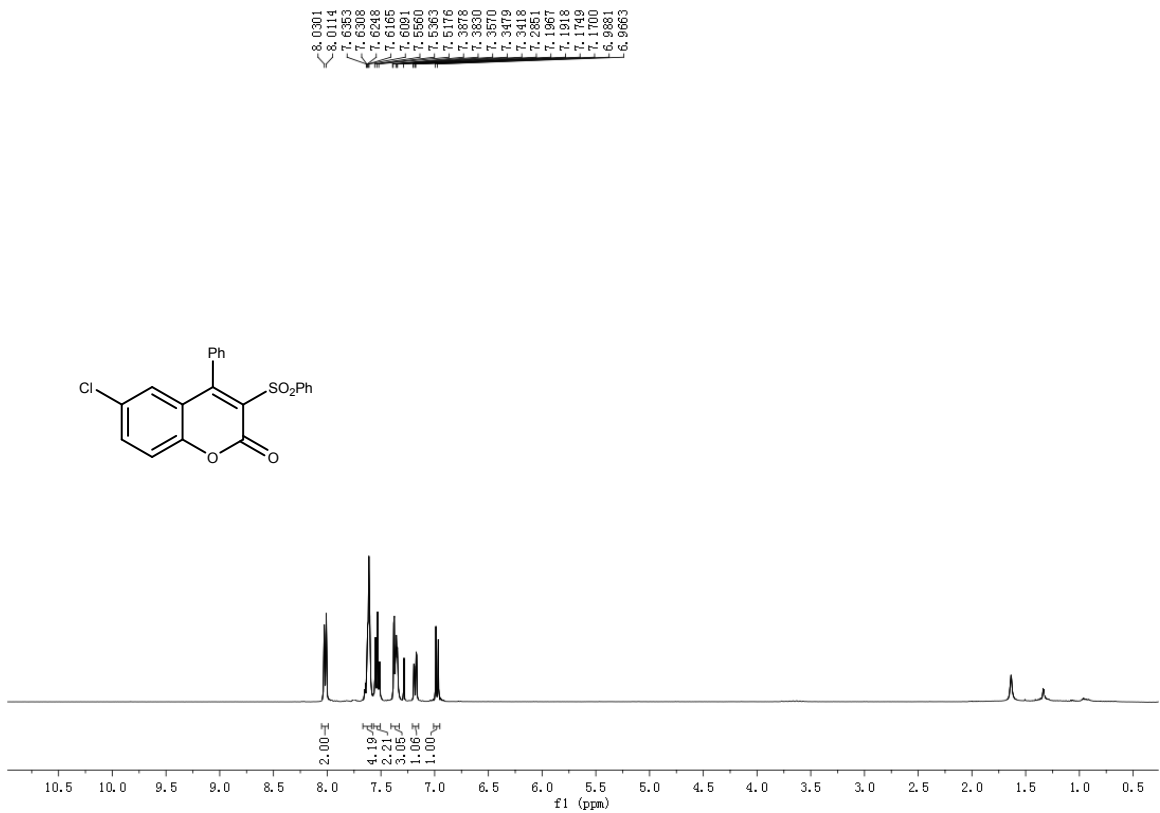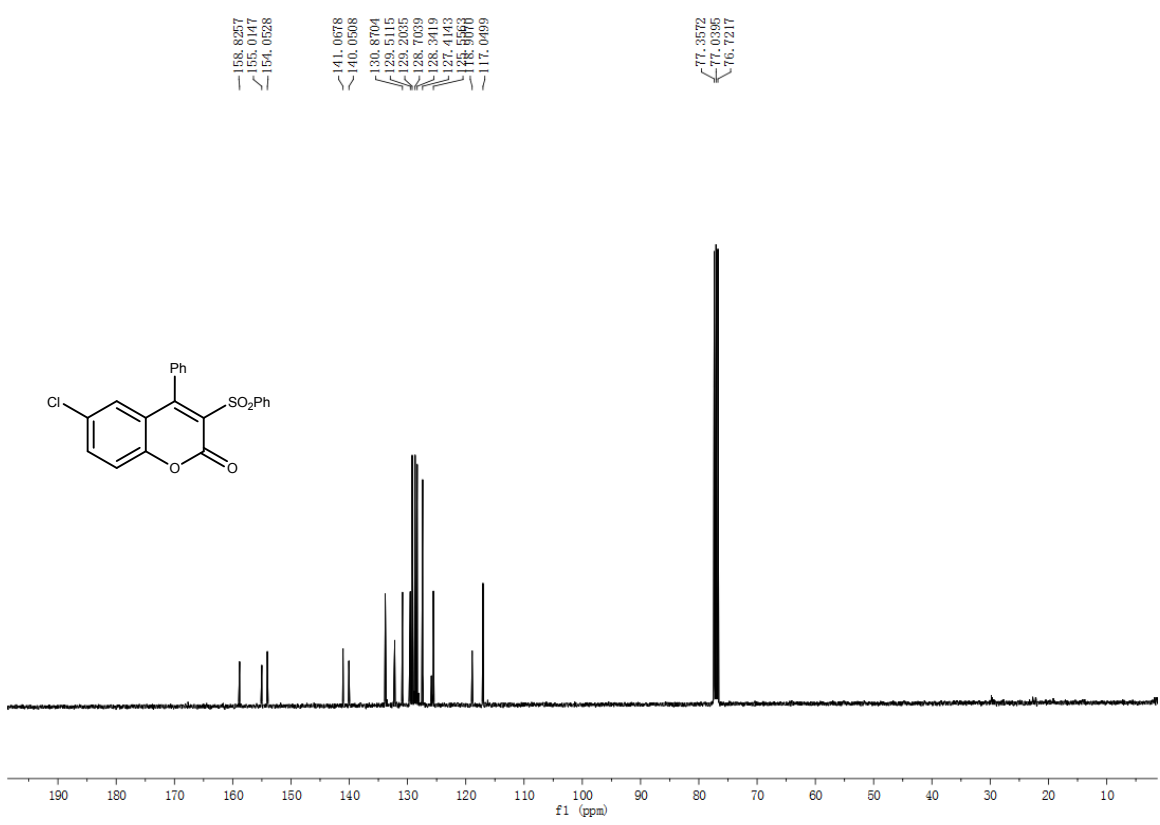



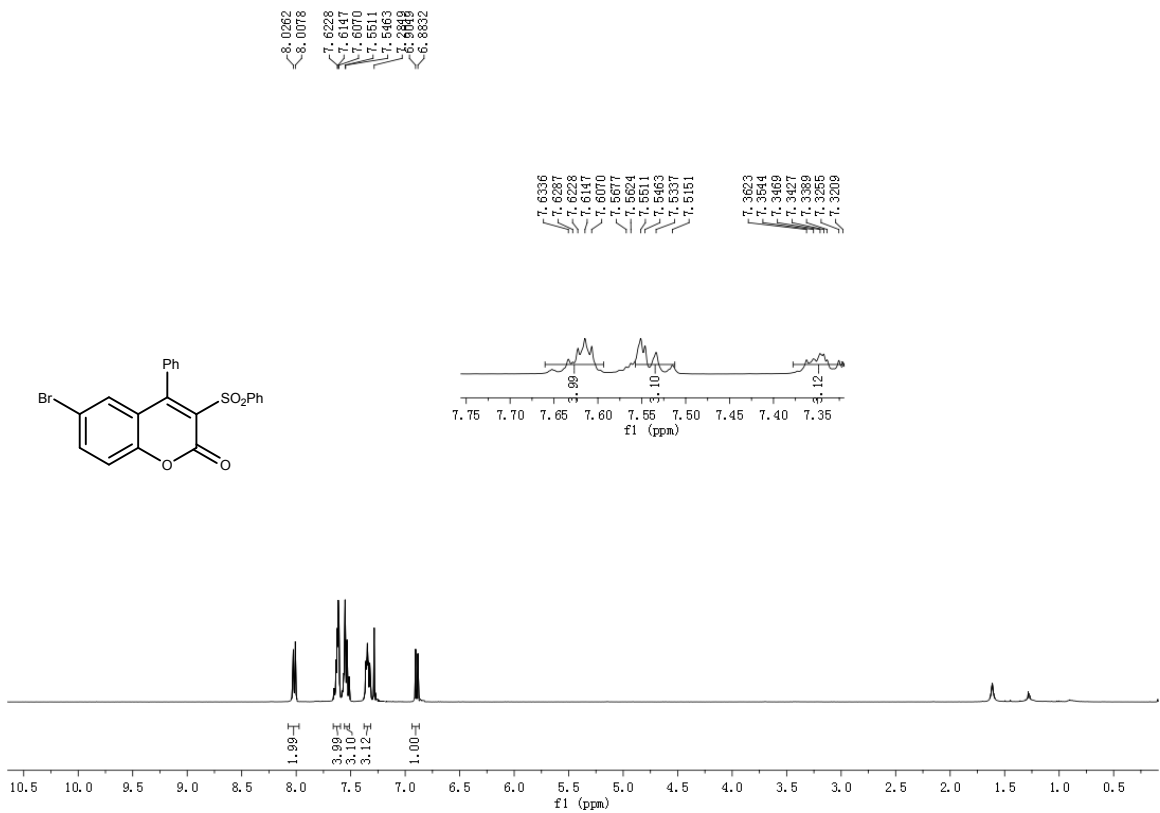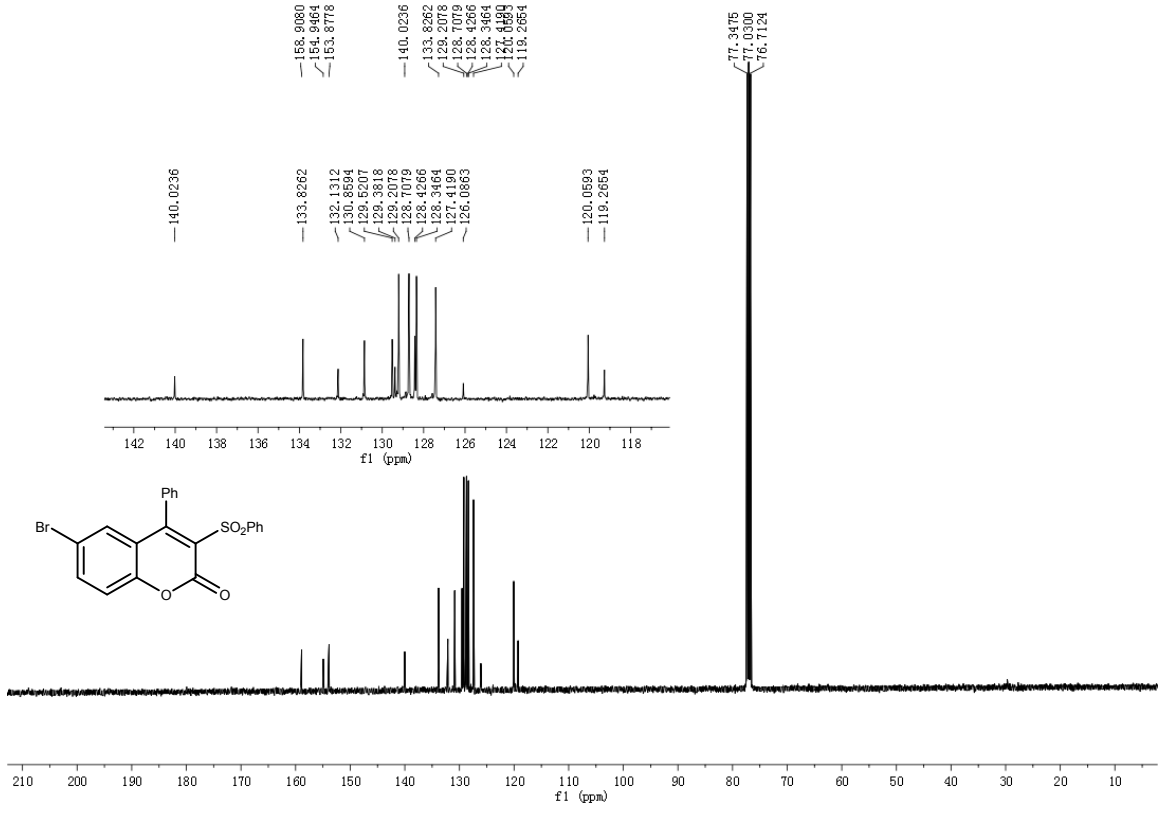

8.0232  
 8.0042  
 7.7841  
 7.6287  
 7.6073  
 7.6018  
 7.5490  
 7.5289  
 7.5109  
 7.3664  
 7.3501  
 7.3412  
 7.2883  
 6.7234  
 6.7020

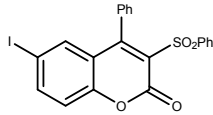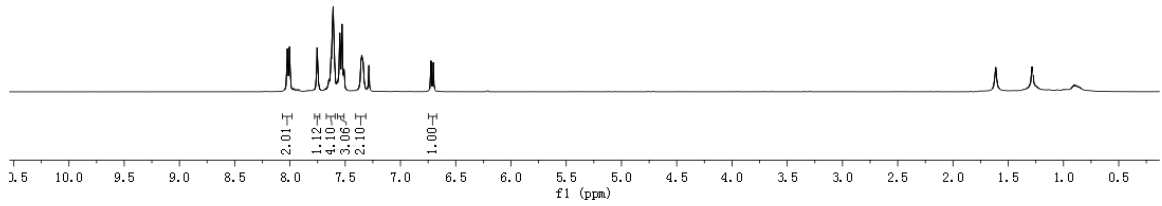

159.0425  
 154.8479  
 153.3889  
 140.0327  
 134.2816  
 129.1992  
 128.7042  
 128.3291  
 127.4245  
 126.9871  
 126.3215  
 125.9974  
 101.6074  
 77.3522  
 77.0346  
 76.7171

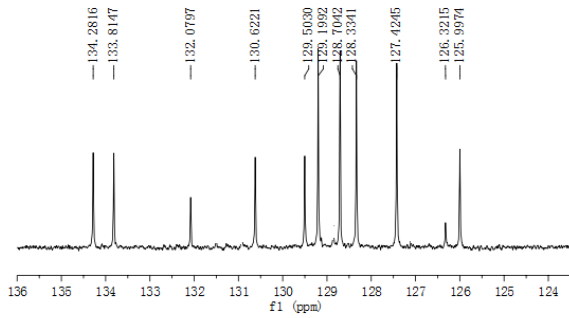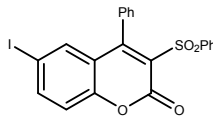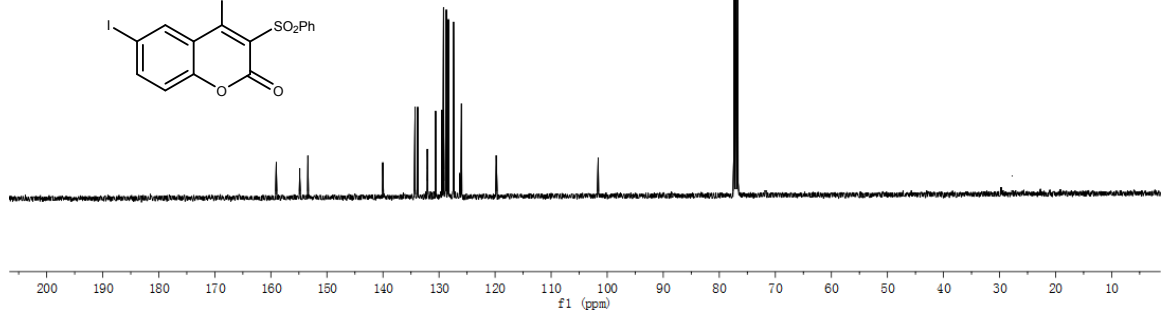

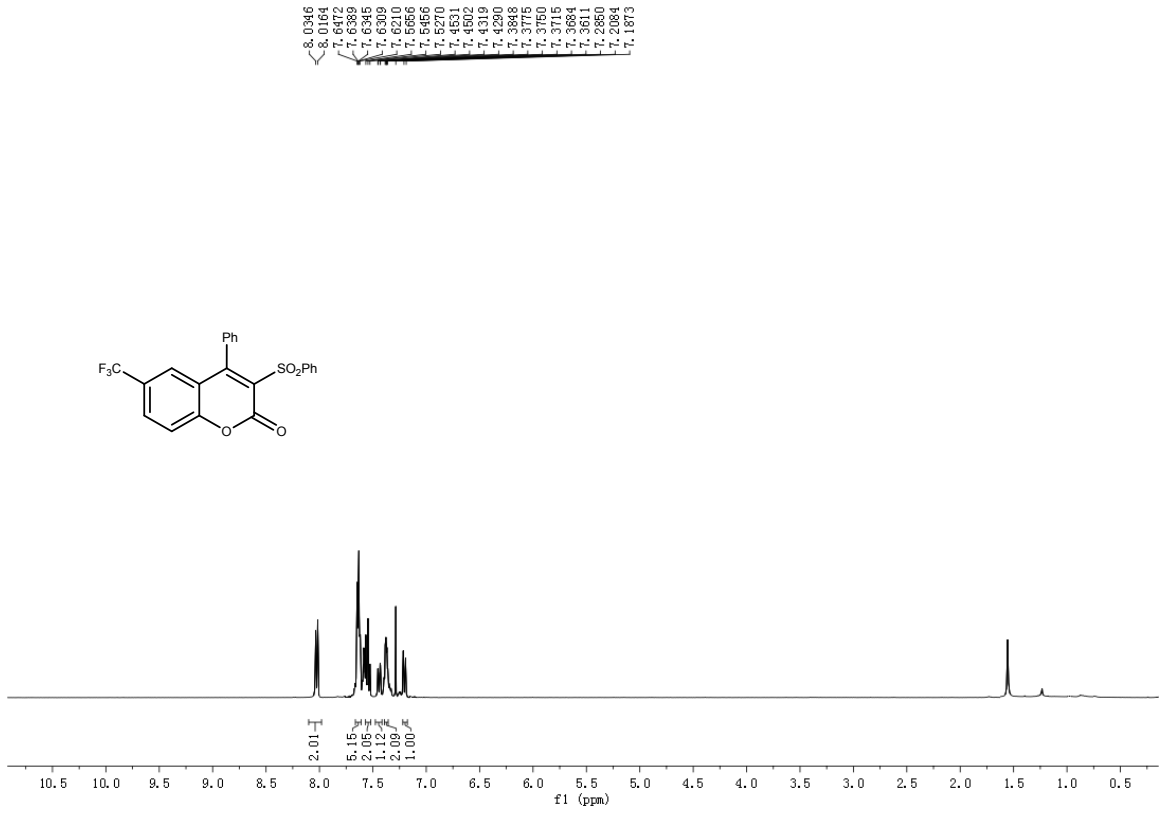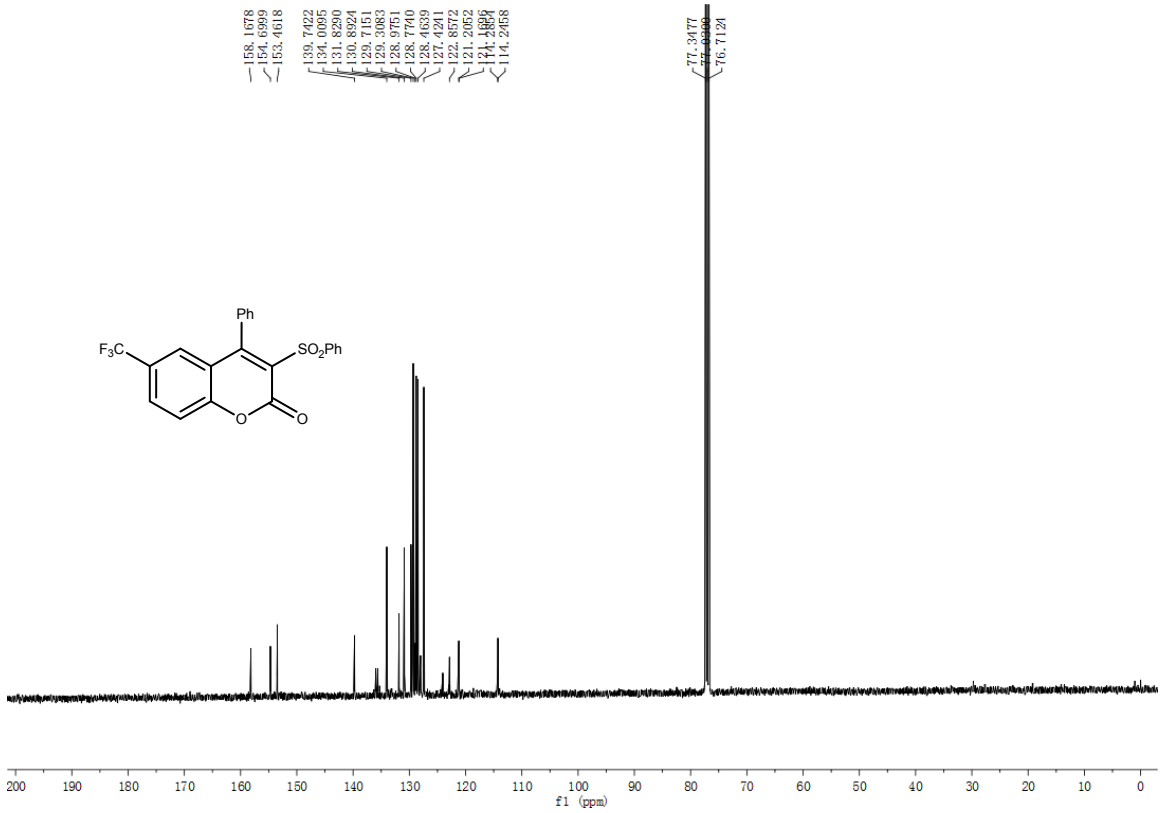

8.0687  
8.0403  
7.6456  
7.6306  
7.6247  
7.6188  
7.6094  
7.5833  
7.5792  
7.5568  
7.5368  
7.5297  
7.5220  
7.5184  
7.5053  
7.4885  
7.4805  
7.4768  
7.4633  
7.4594  
7.4422  
7.4380  
7.4343  
7.4087  
7.4002  
7.3951  
7.2850  
7.1159  
7.0948

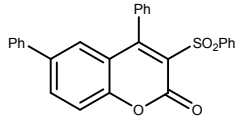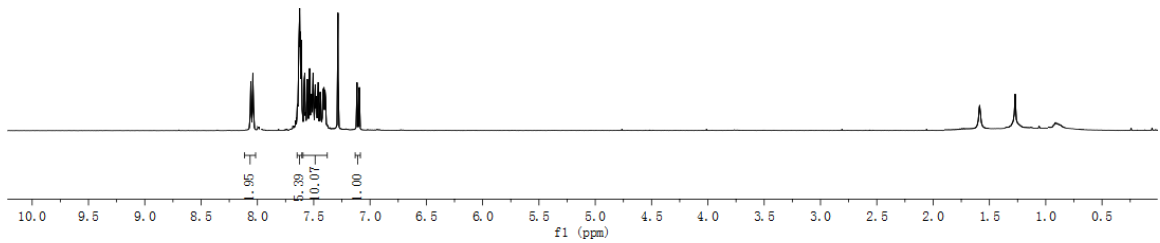

159.3656  
155.7668  
154.3580  
147.8907  
140.3538  
138.2843  
133.6438  
132.6734  
131.5096  
130.9130  
130.3295  
128.3016  
128.1397  
128.0571  
128.2218  
127.5040  
125.3246  
123.6342  
119.0878  
114.7258

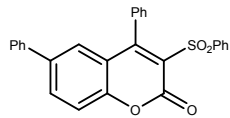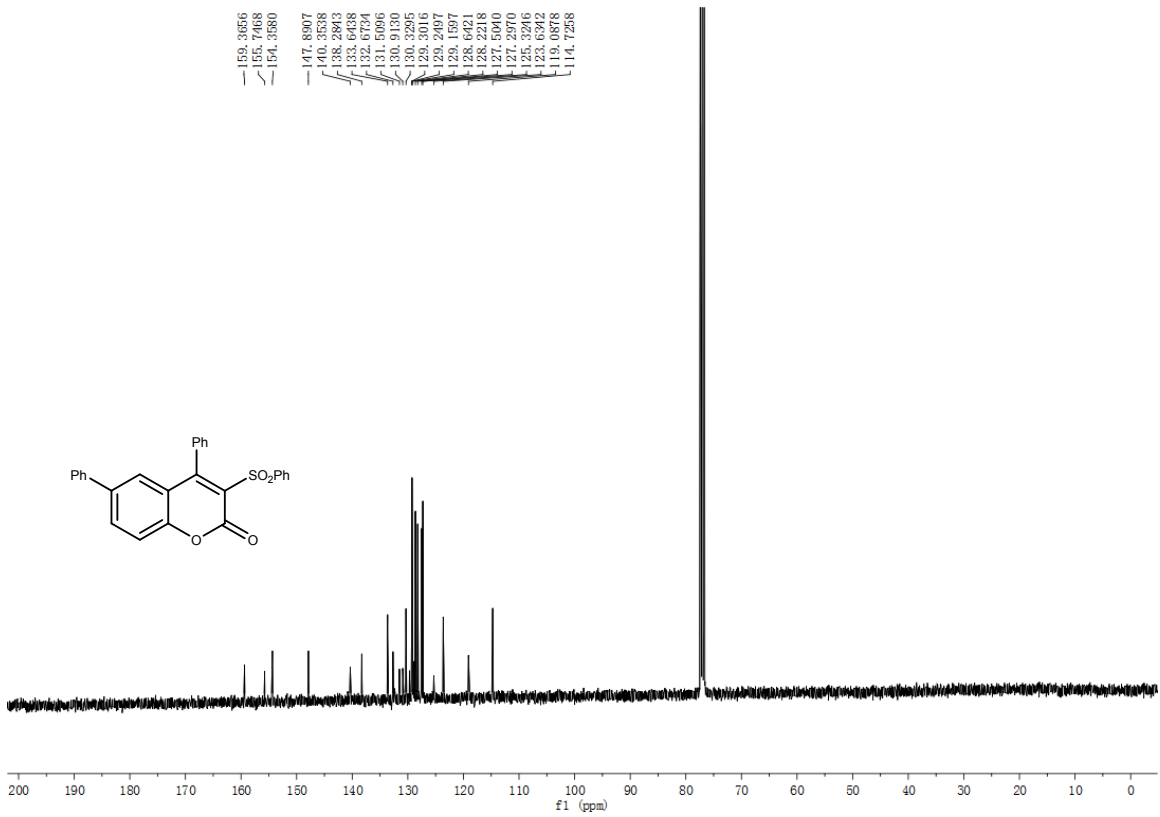

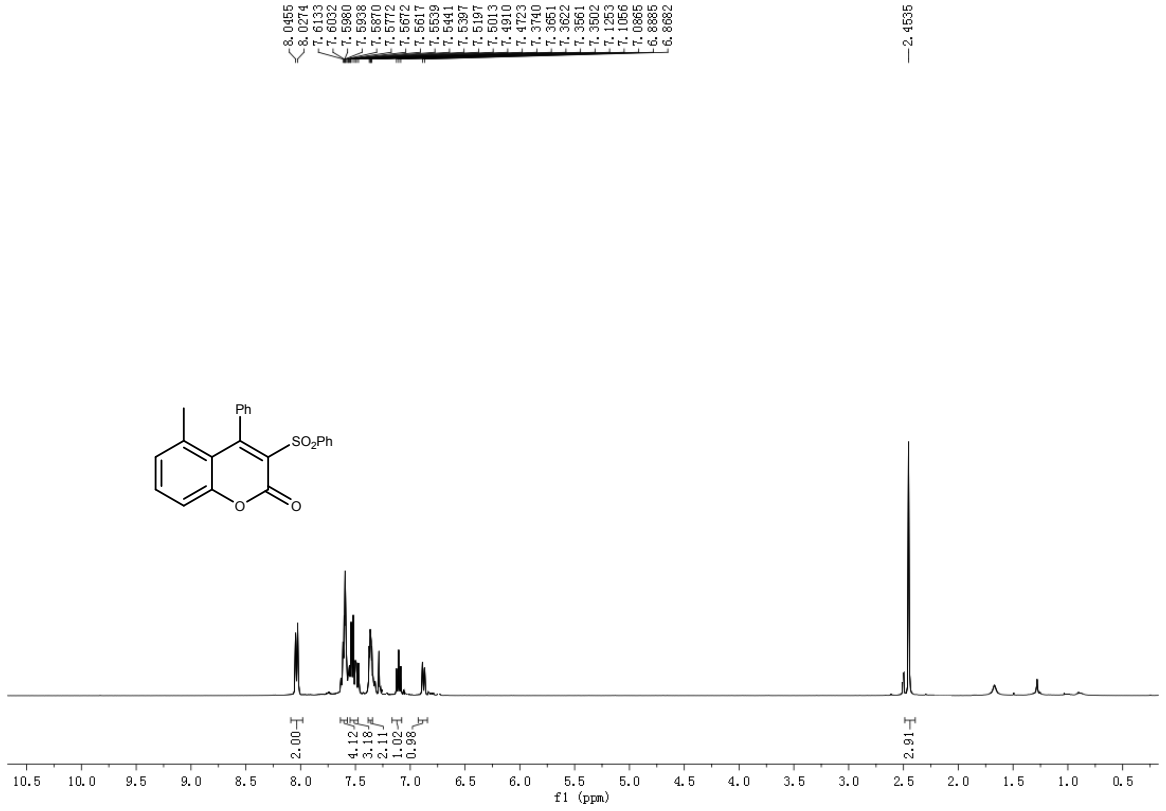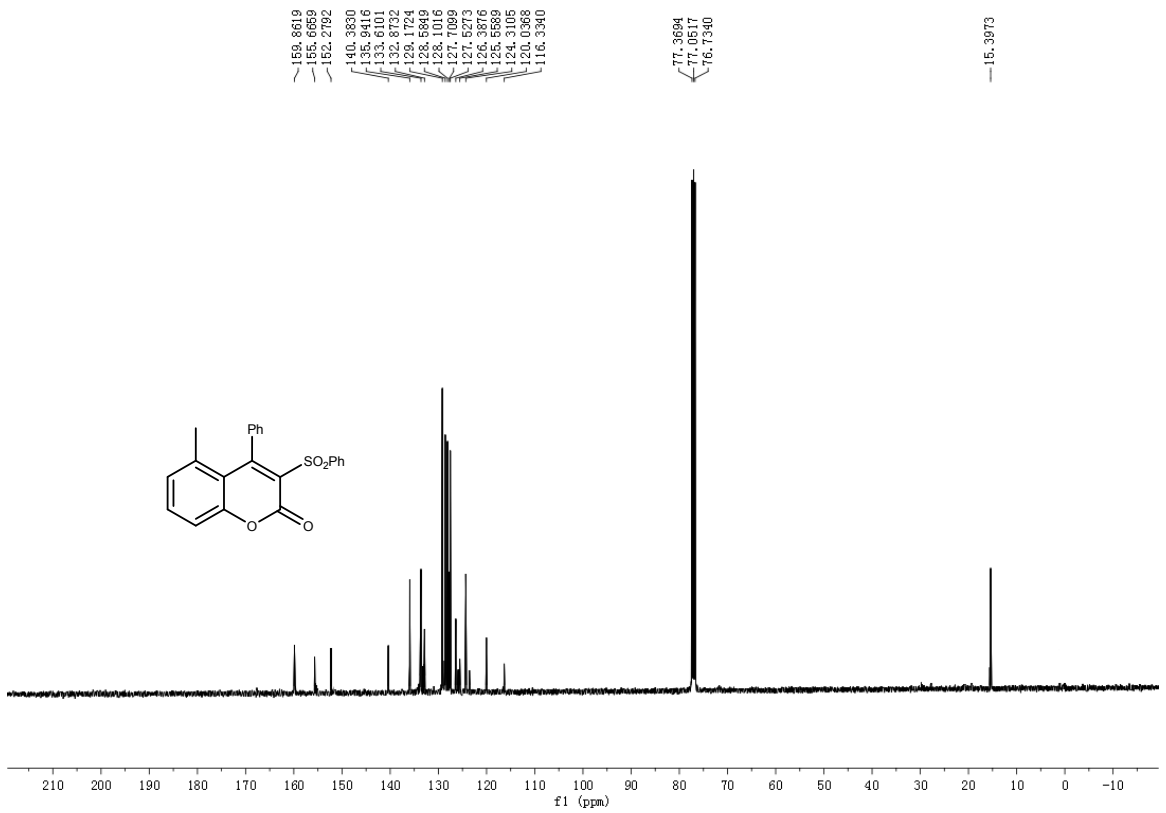

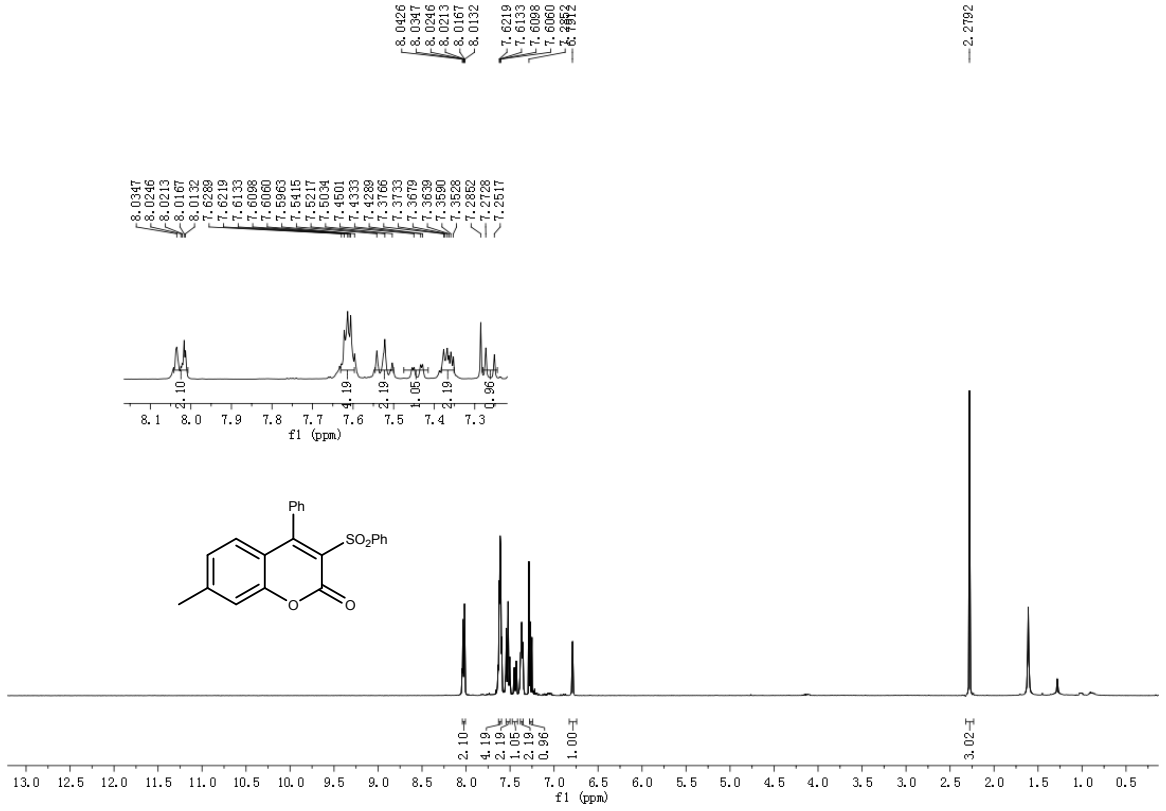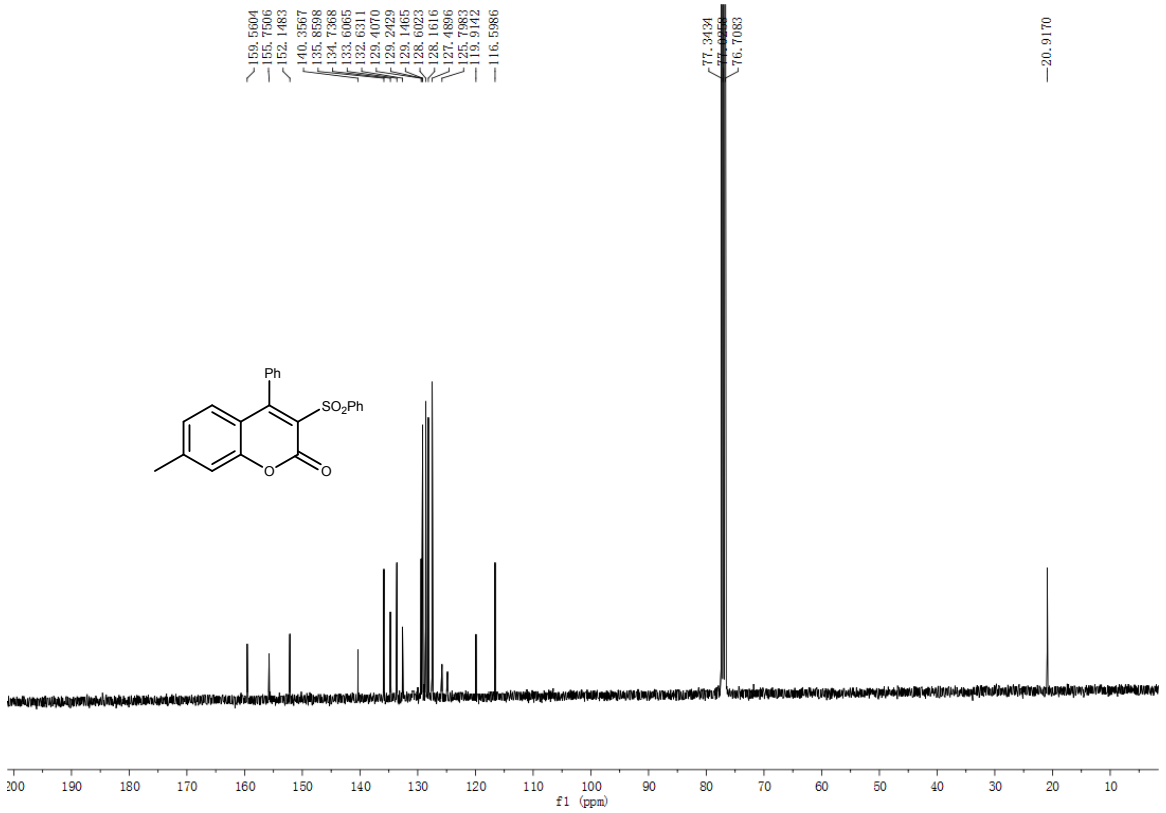



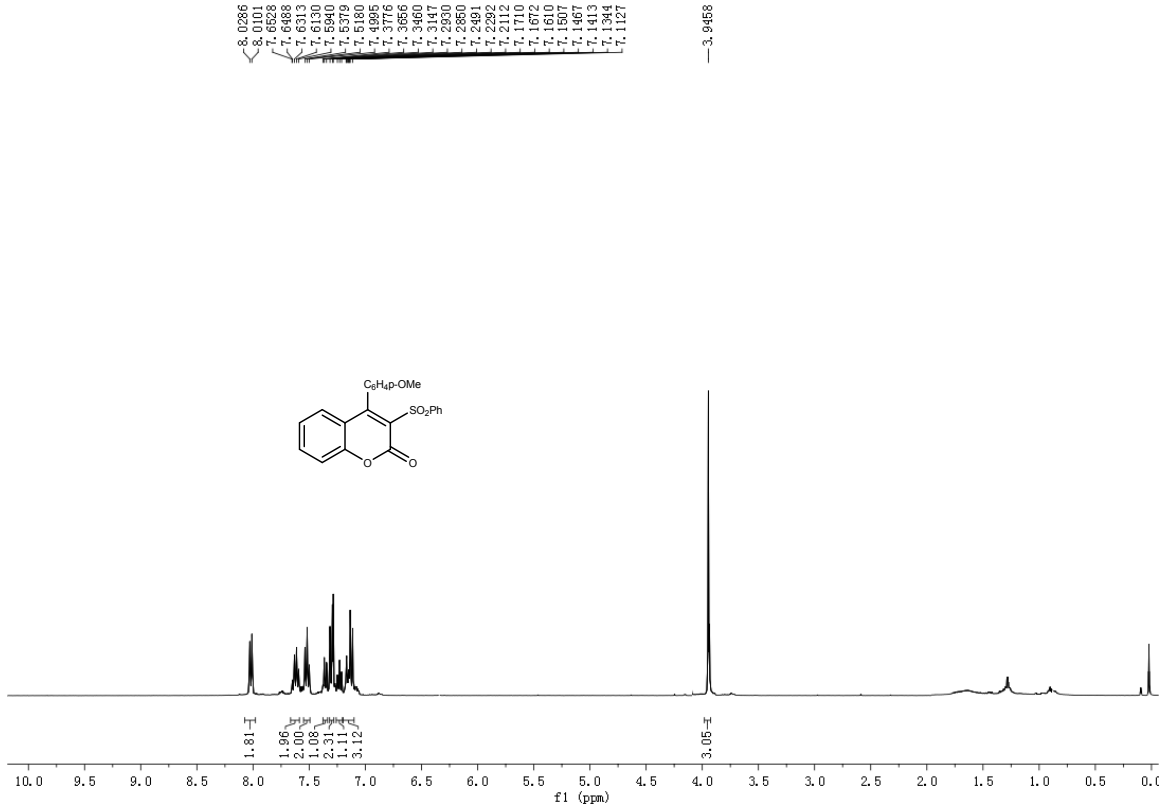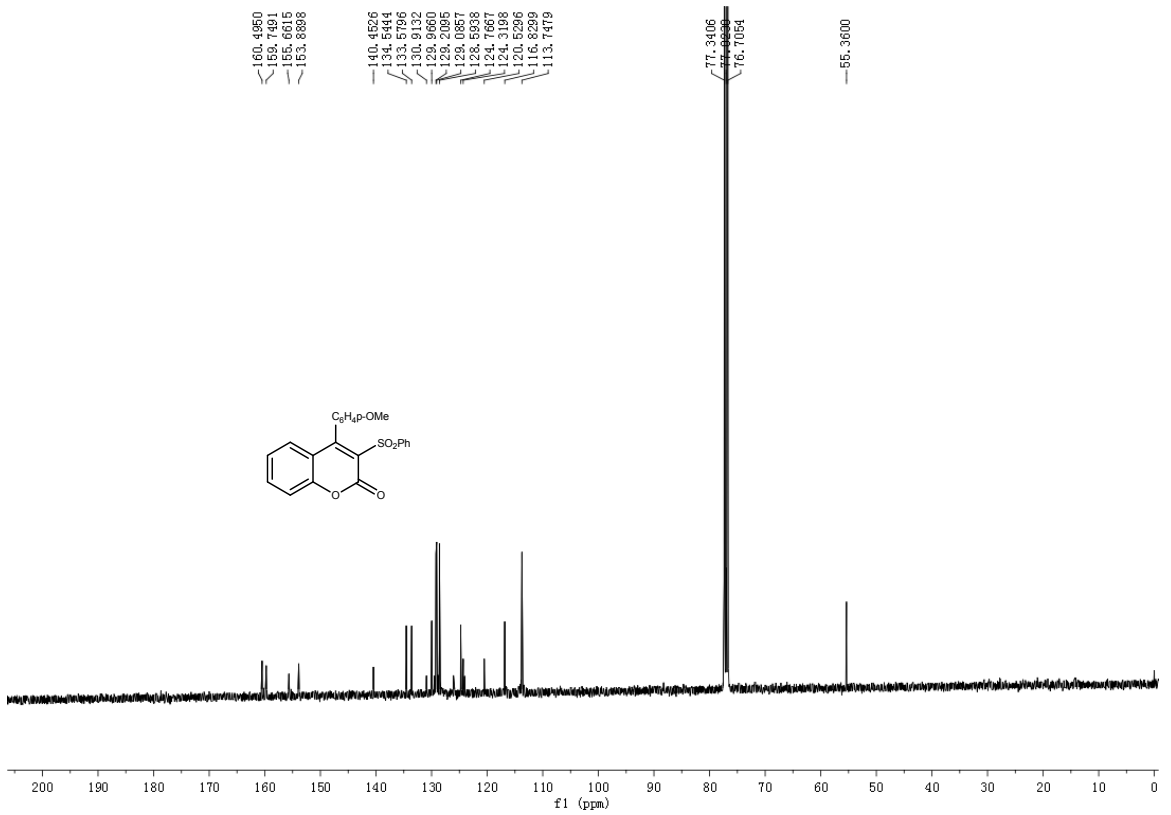



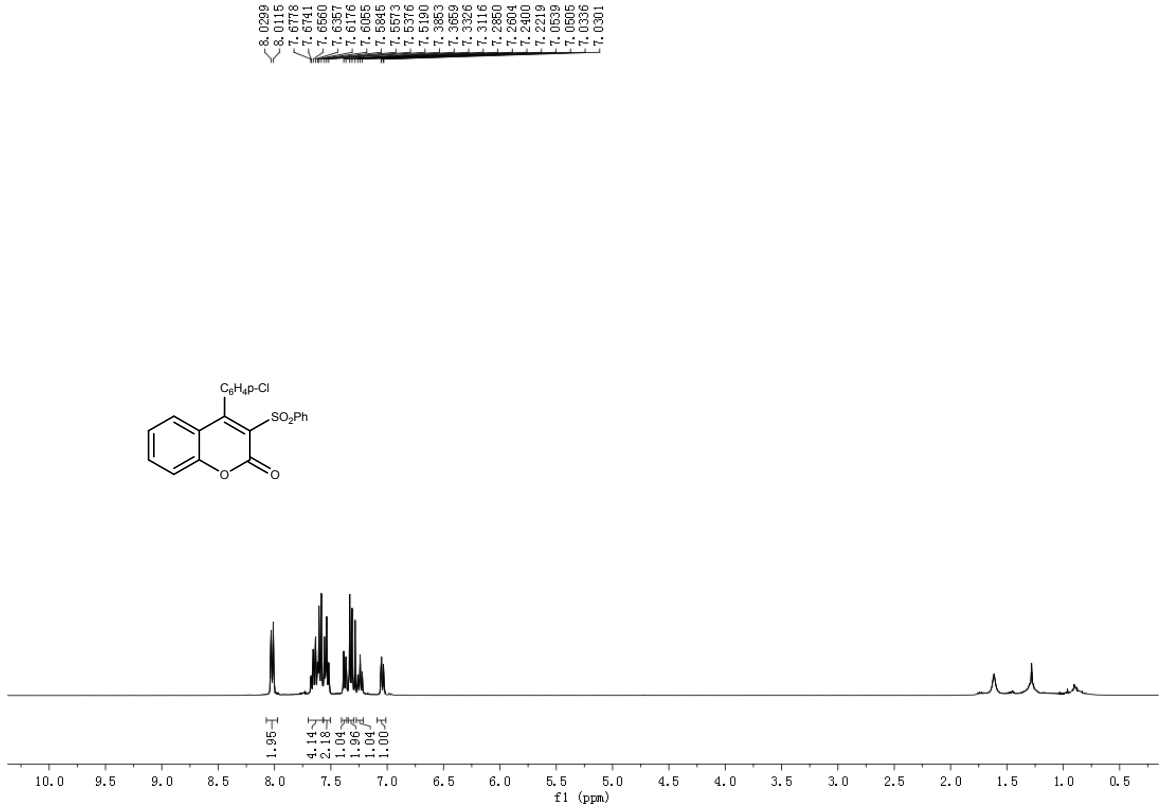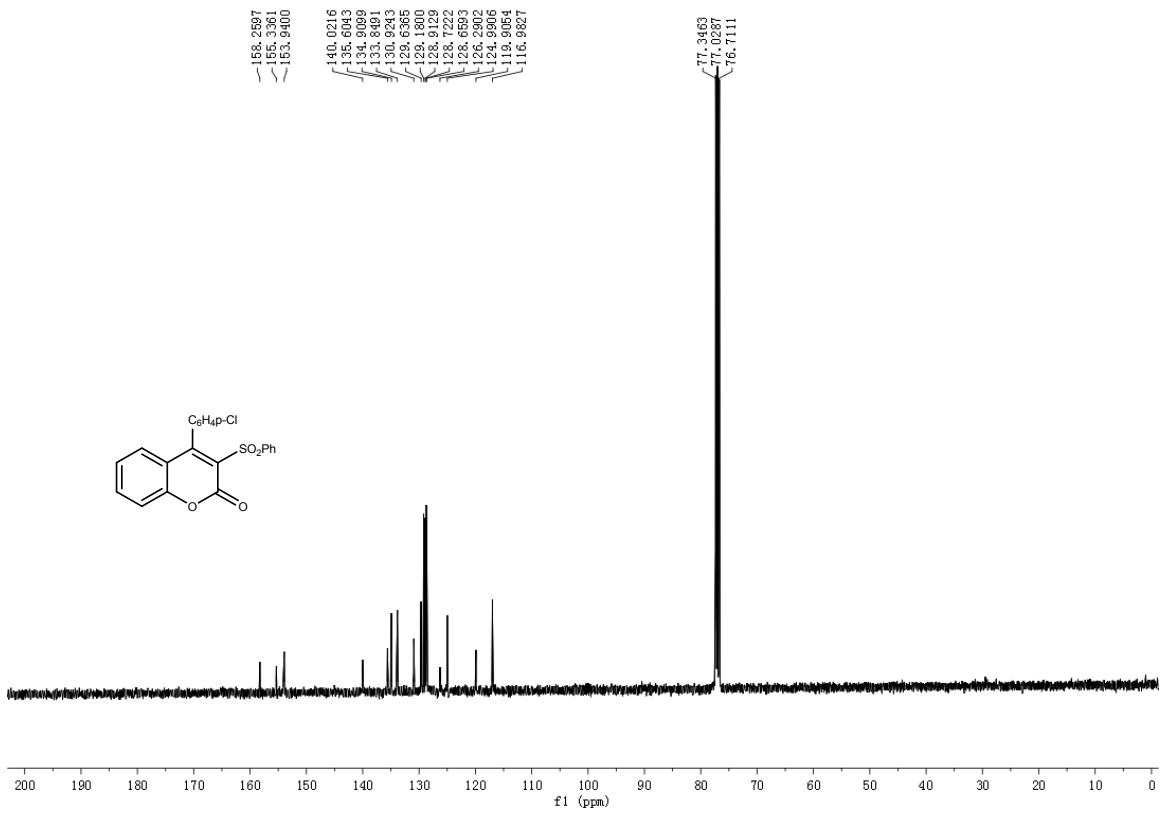

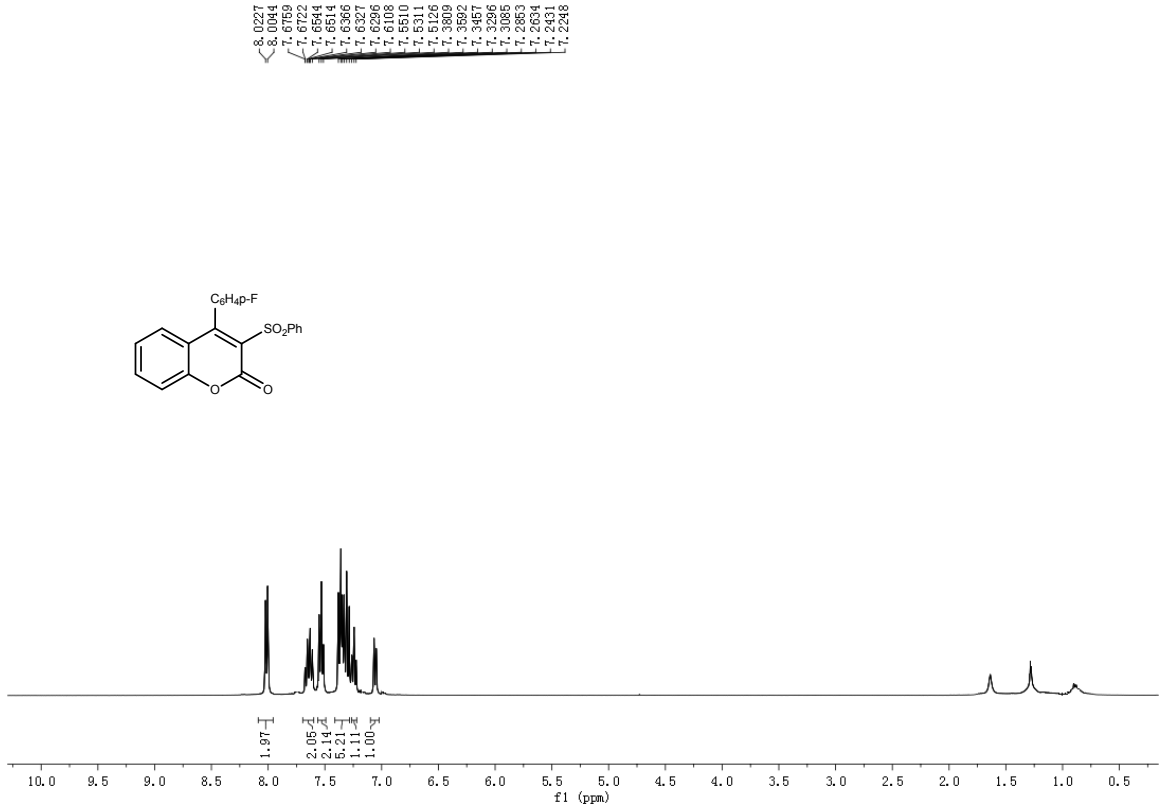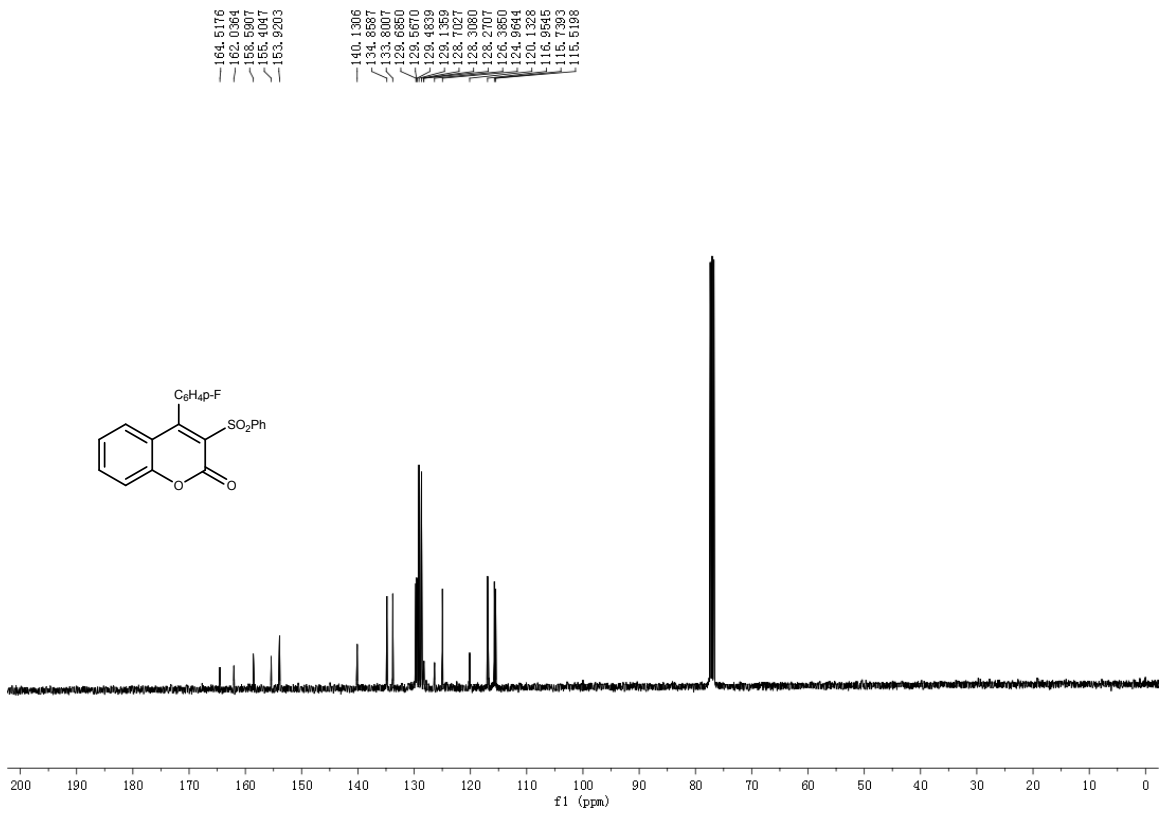

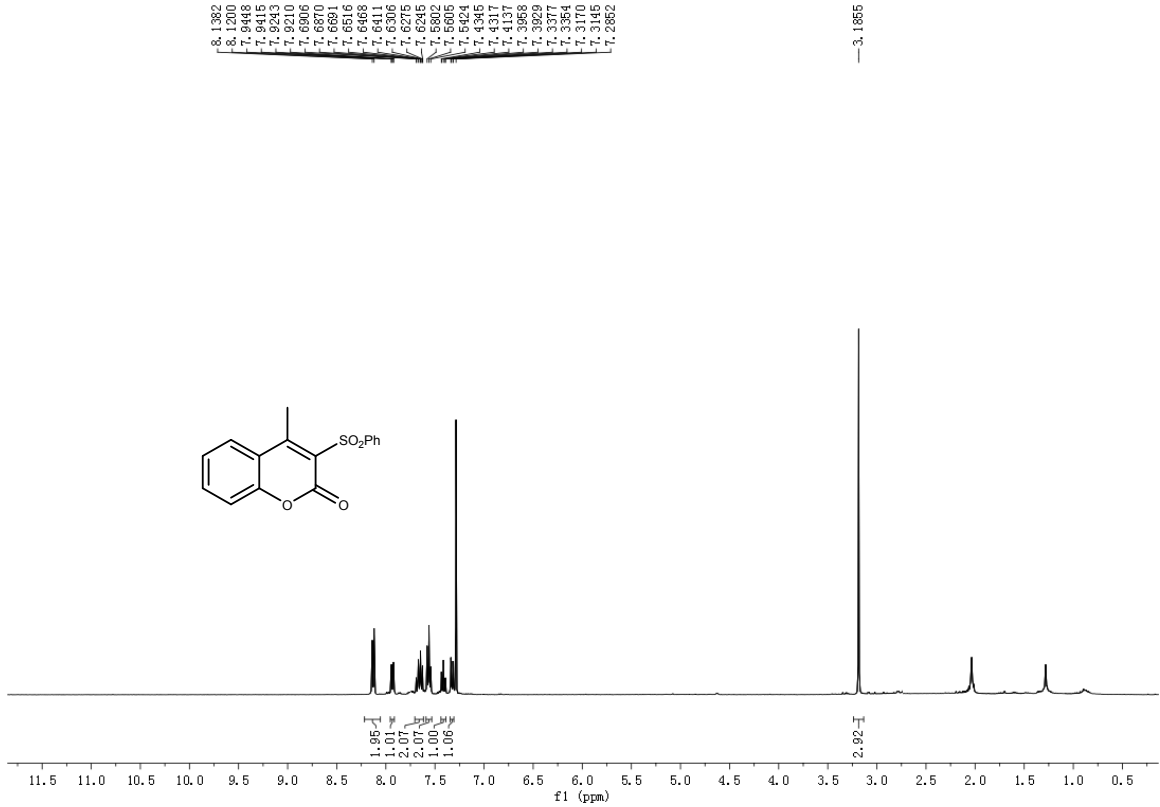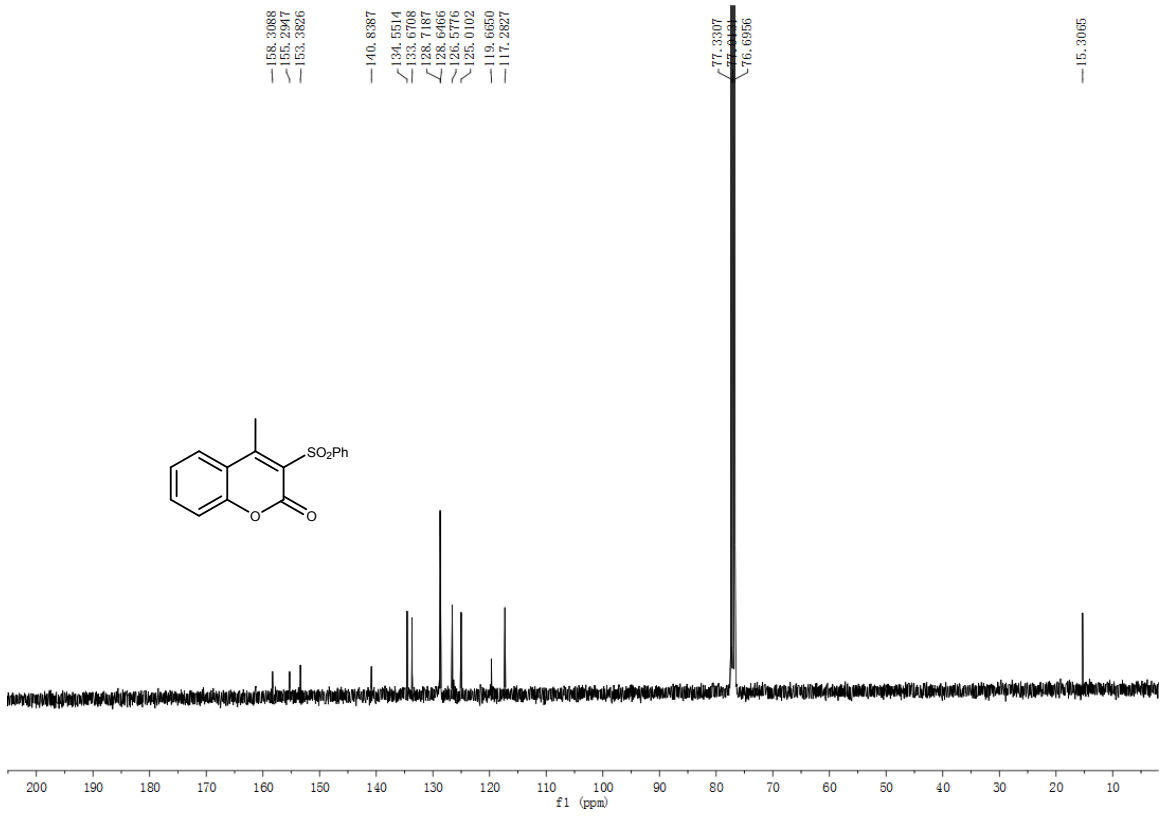

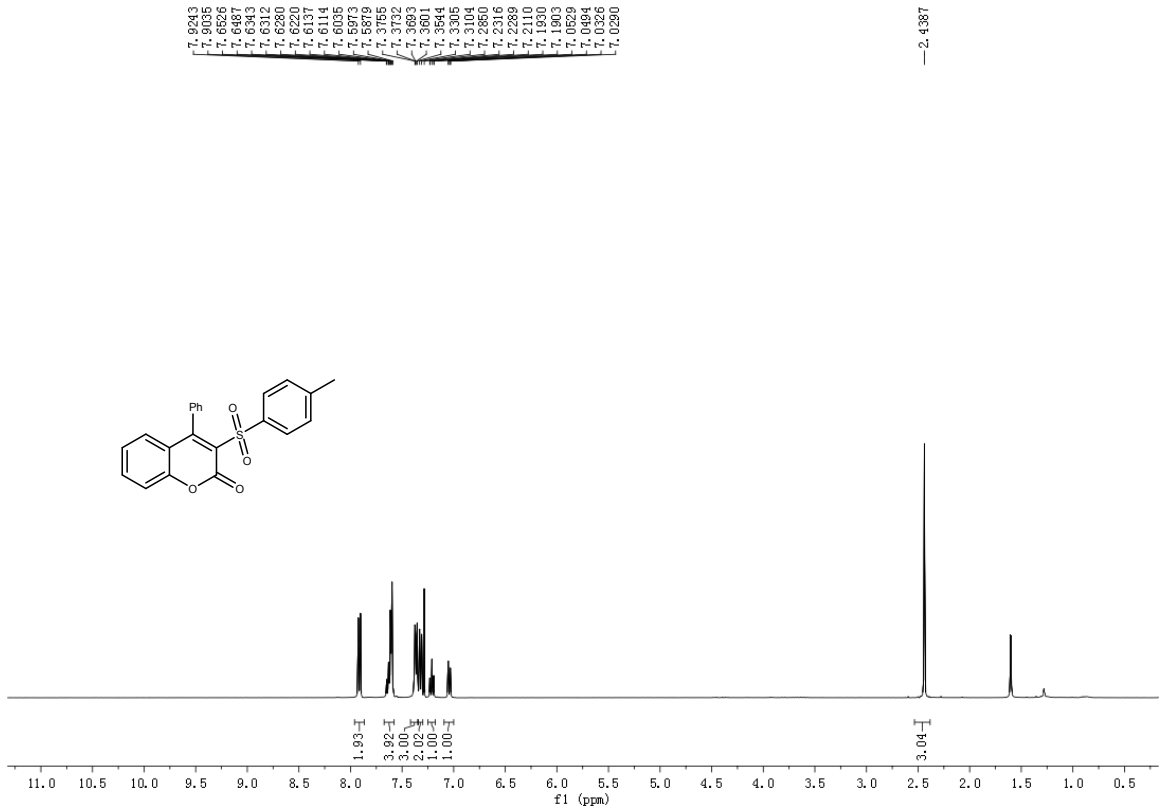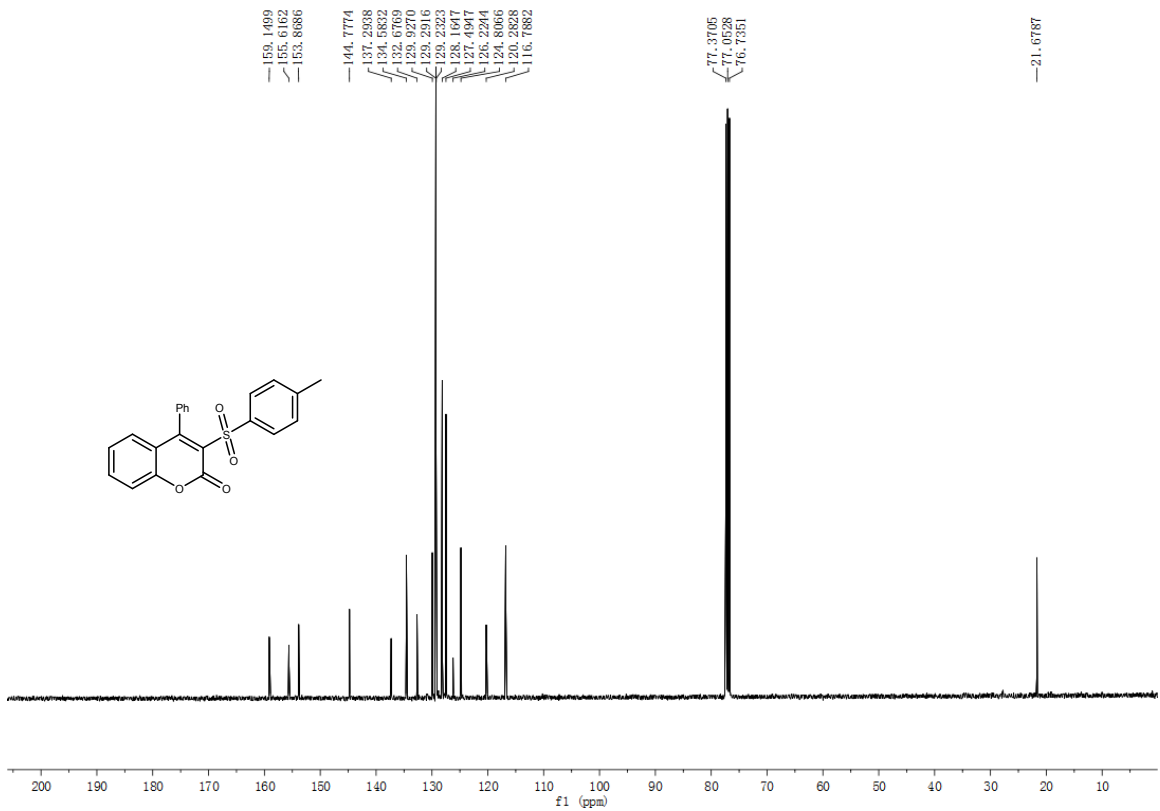

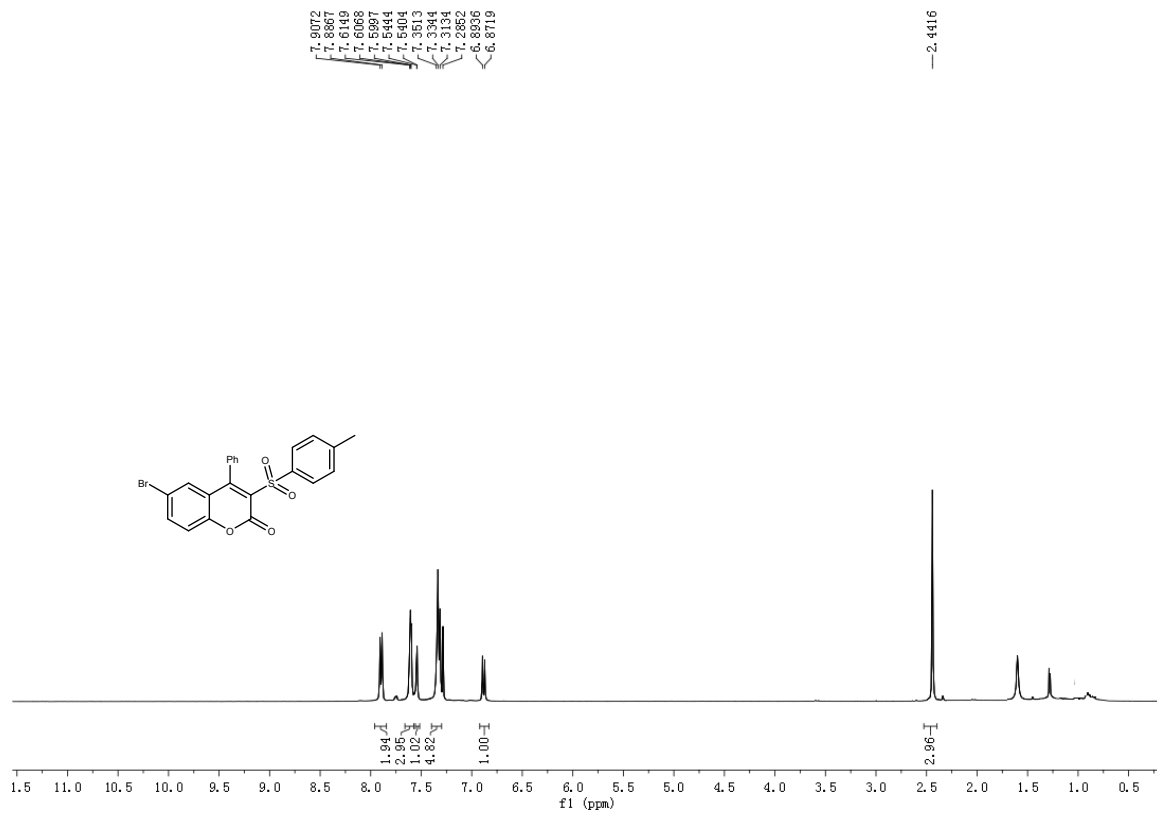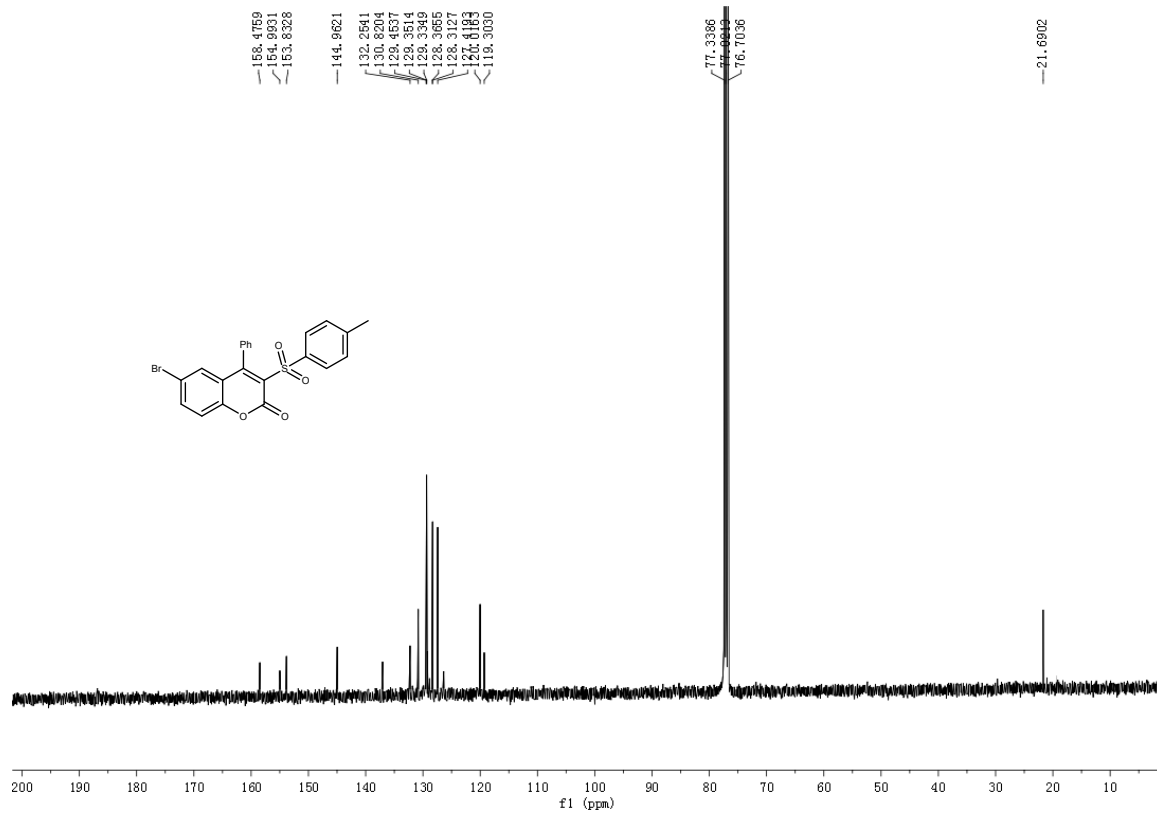

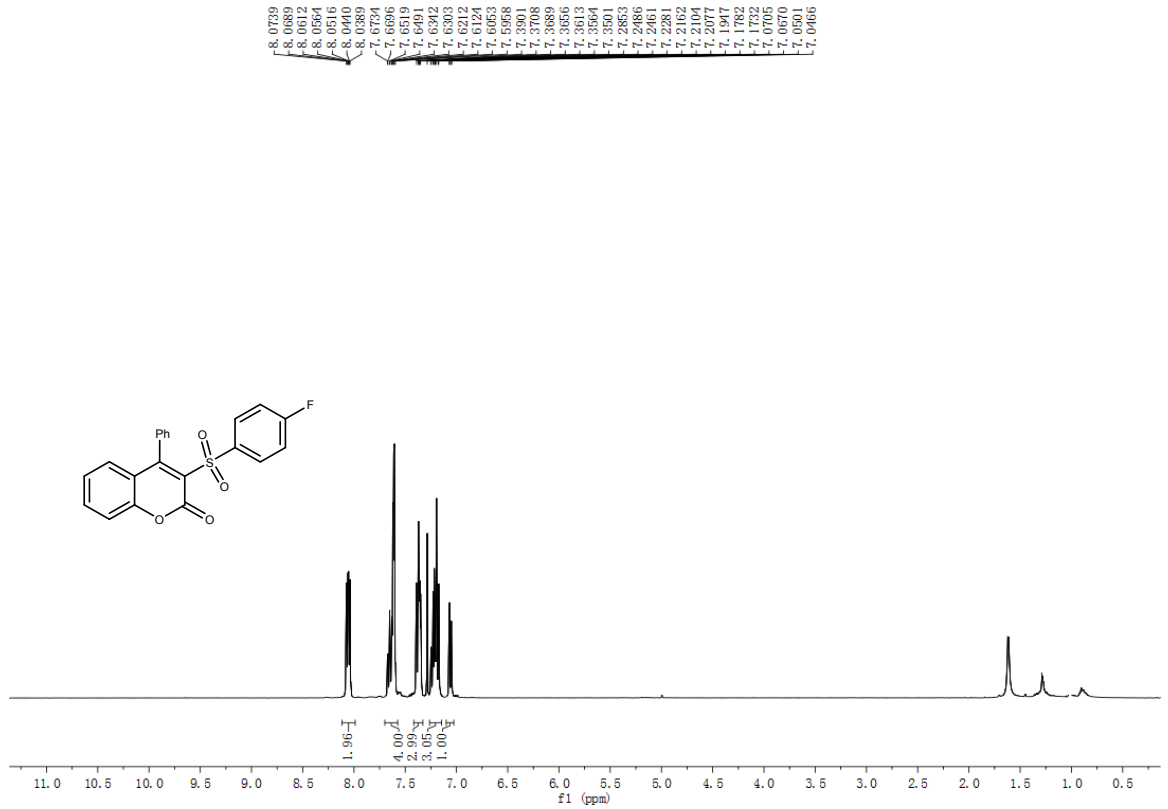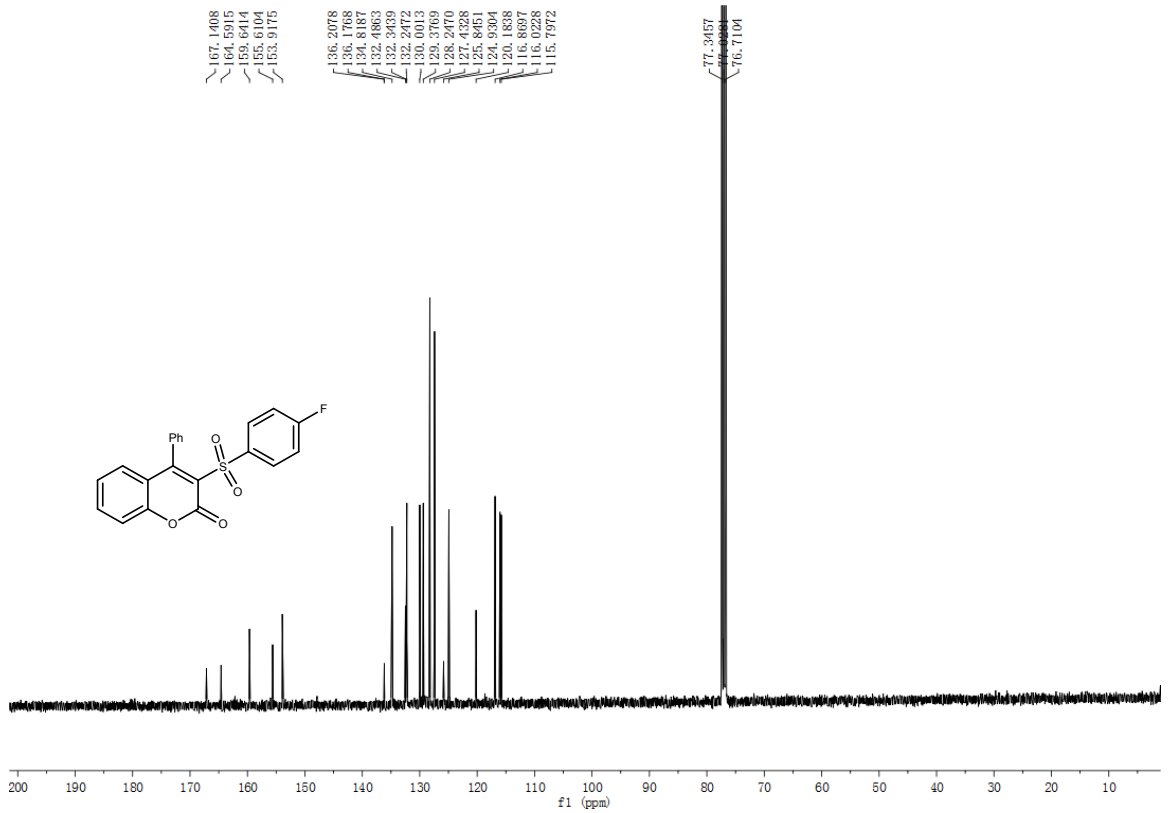

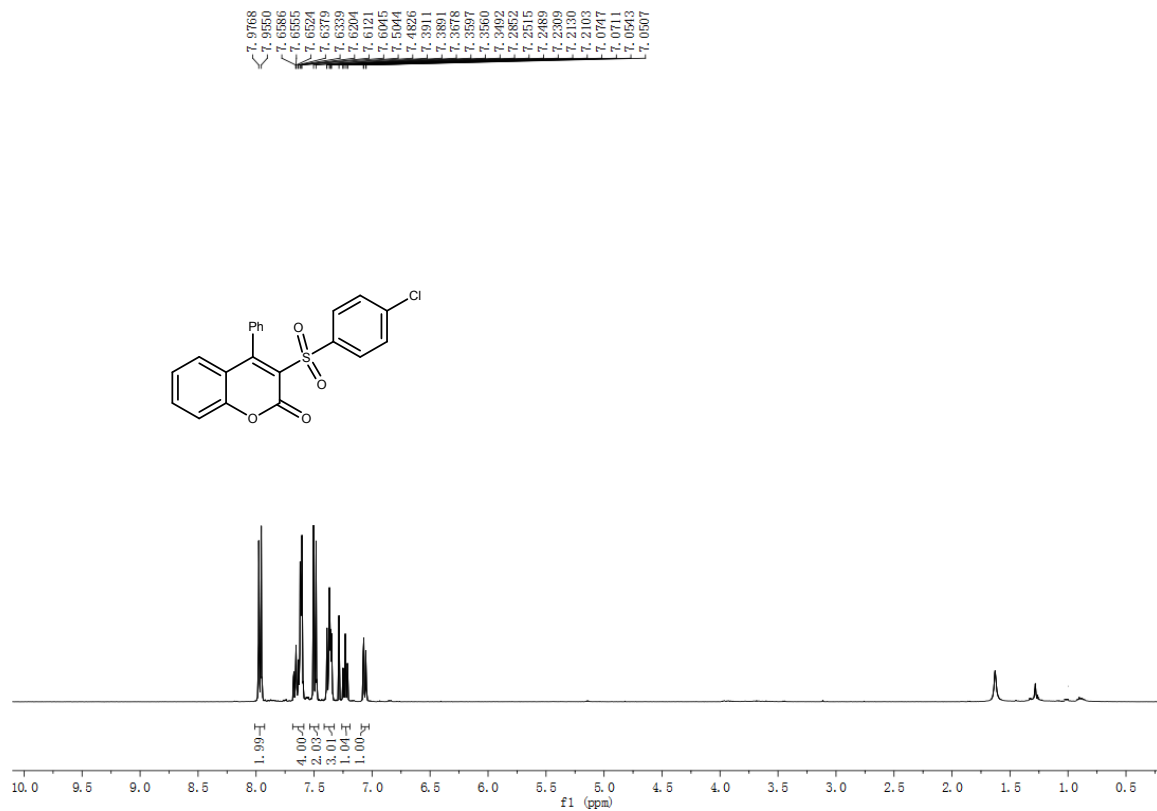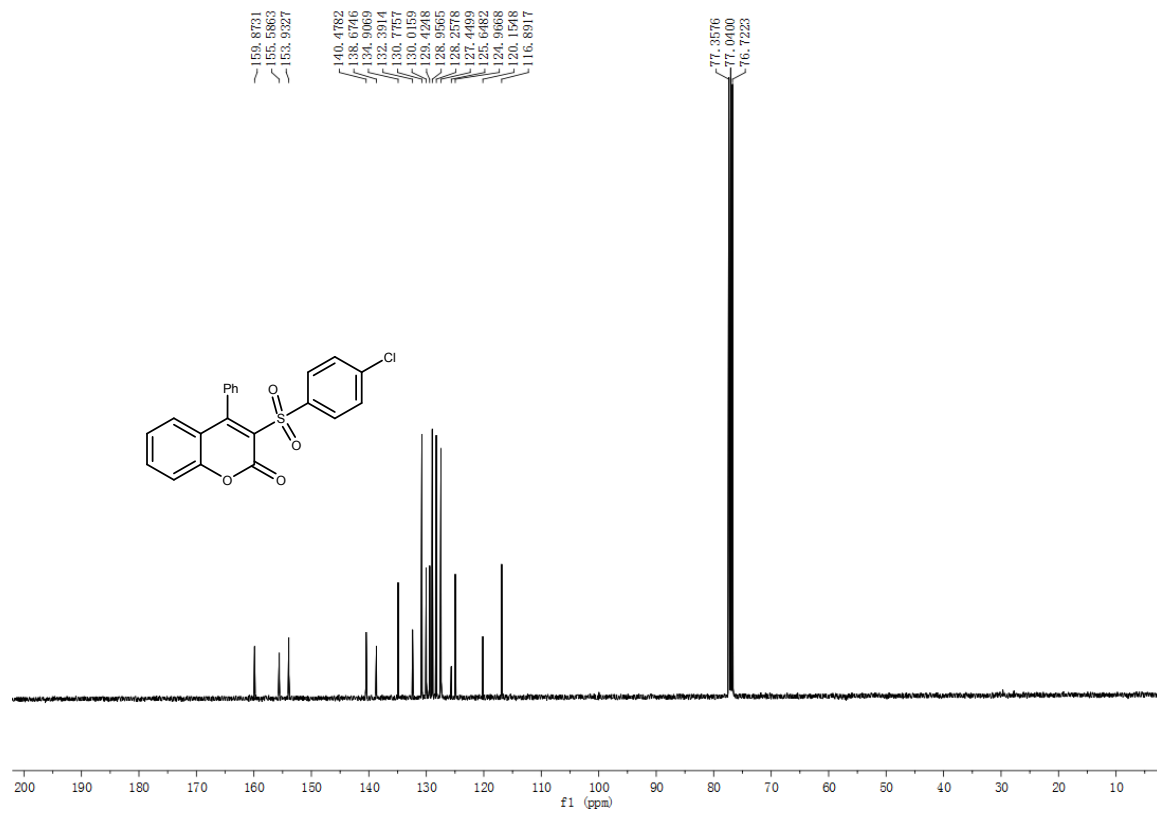

7.8990  
7.8772  
7.8780  
7.6739  
7.6690  
7.6596  
7.6568  
7.6322  
7.6311  
7.6381  
7.6246  
7.6199  
7.6145  
7.6119  
7.6040  
7.5998  
7.3927  
7.3908  
7.3896  
7.3836  
7.3605  
7.3571  
7.3542  
7.3469  
7.2853  
7.2518  
7.2489  
7.2311  
7.2288  
7.2132  
7.2104  
7.0746  
7.0709  
7.0642  
7.0605

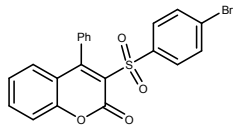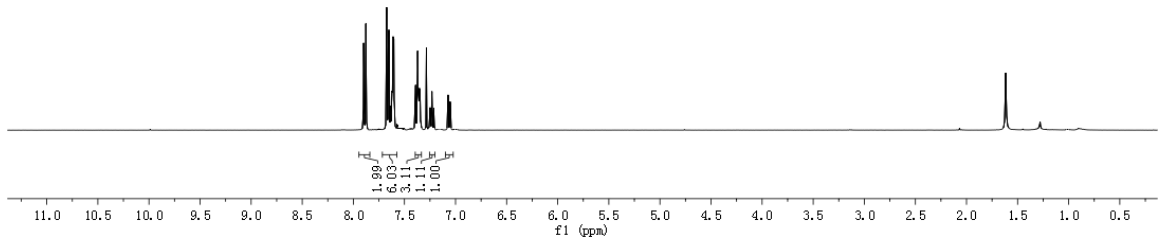

155.8907  
155.5717  
153.9357  
139.2200  
134.9092  
132.3732  
131.9511  
130.8178  
130.0121  
129.4316  
128.1523  
128.2598  
127.6777  
125.6173  
124.9645  
120.1509  
116.8970

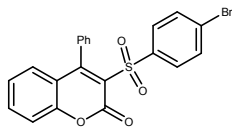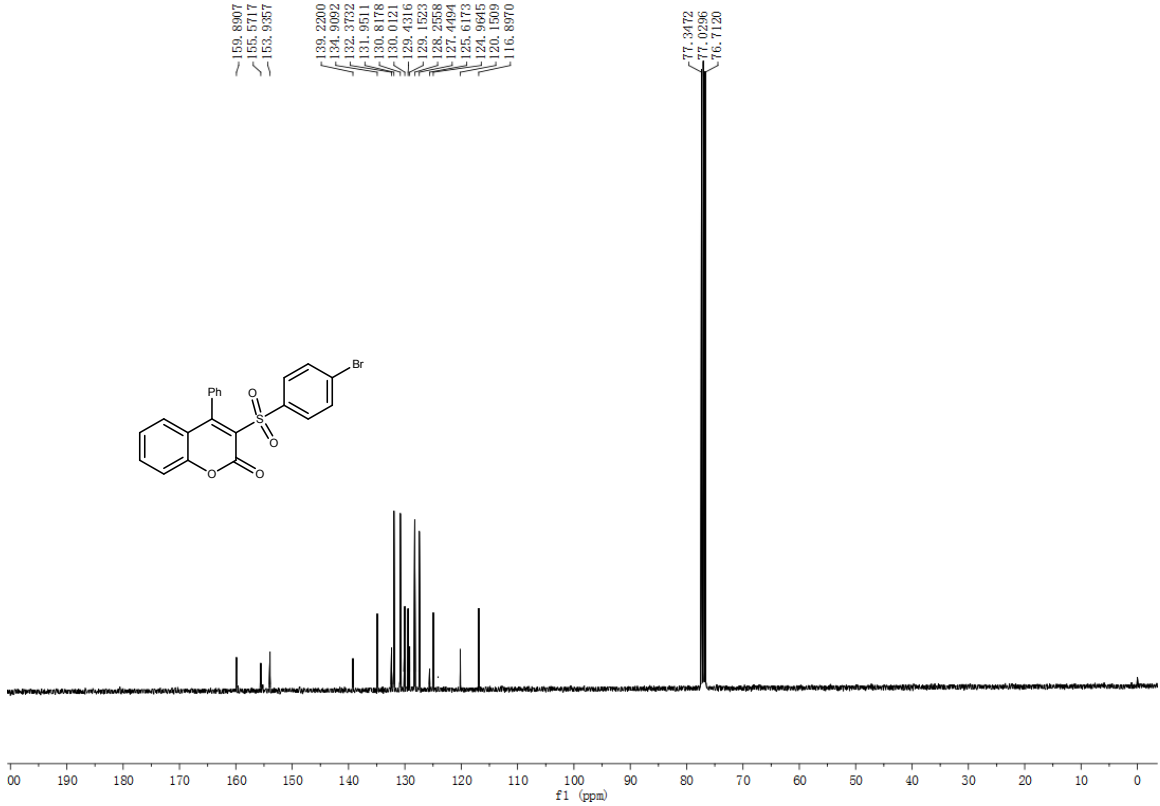



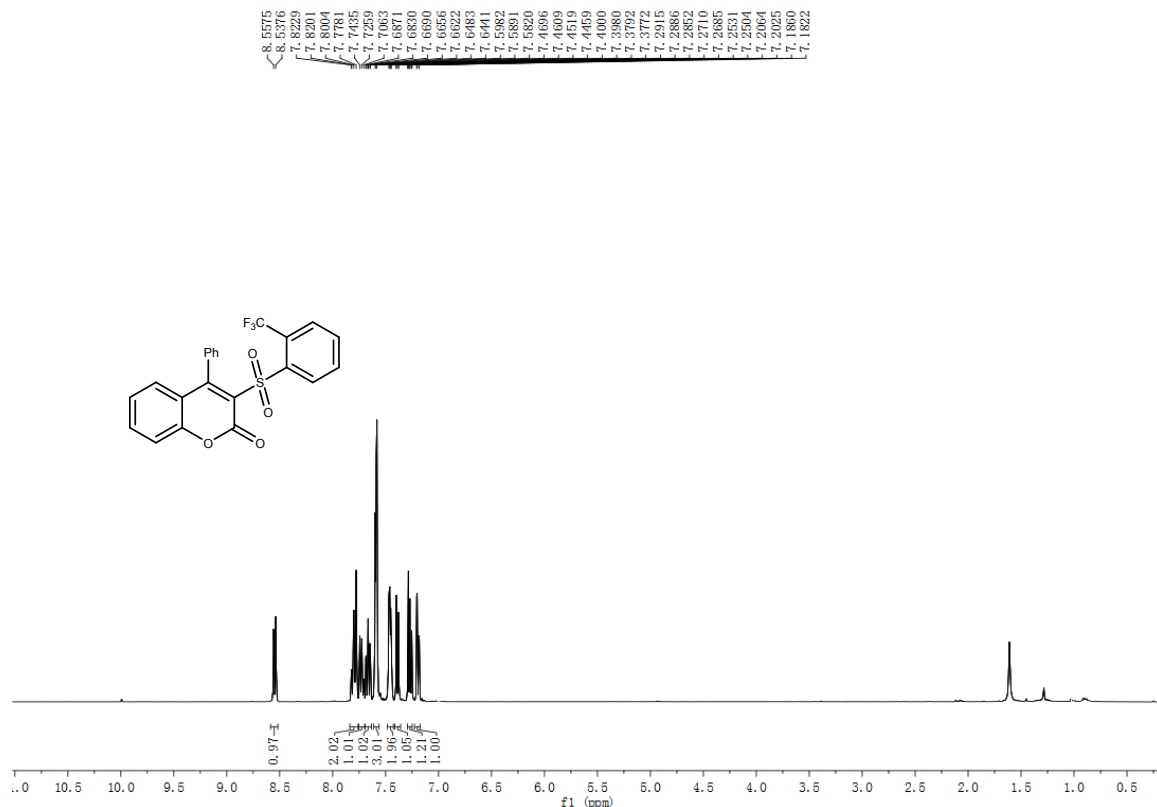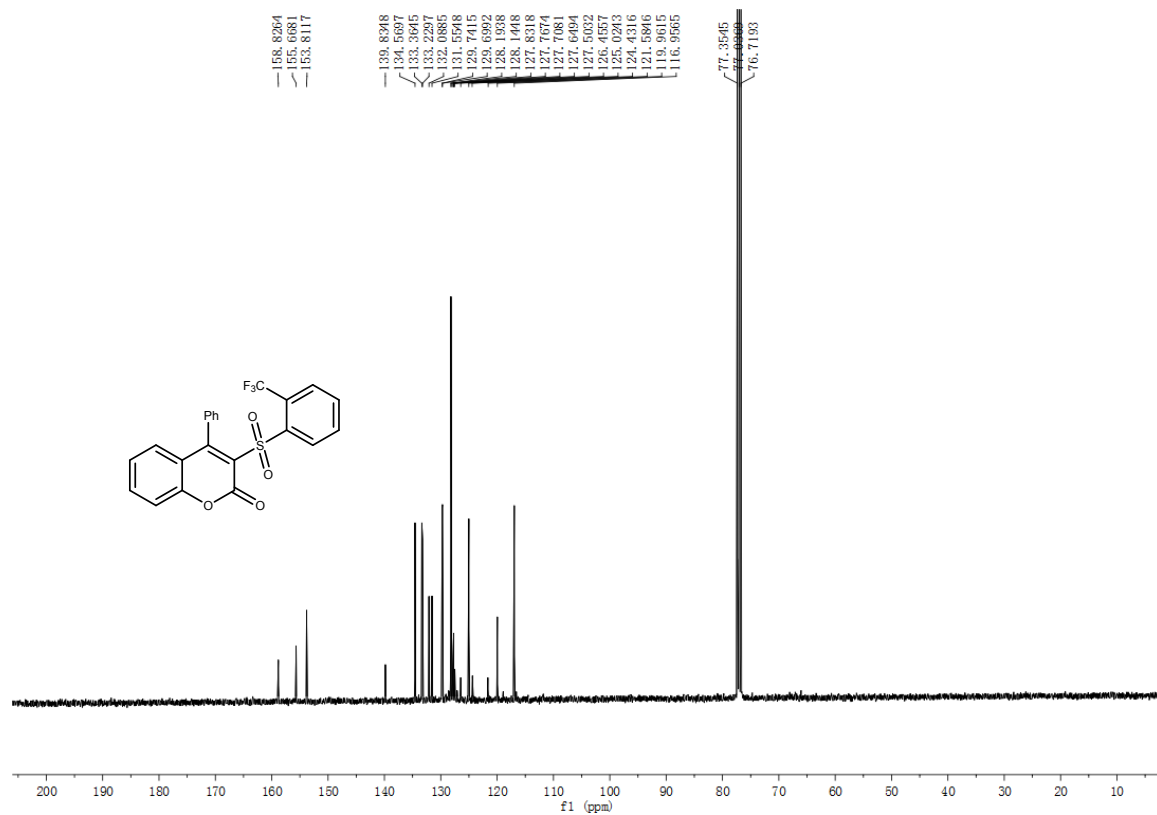

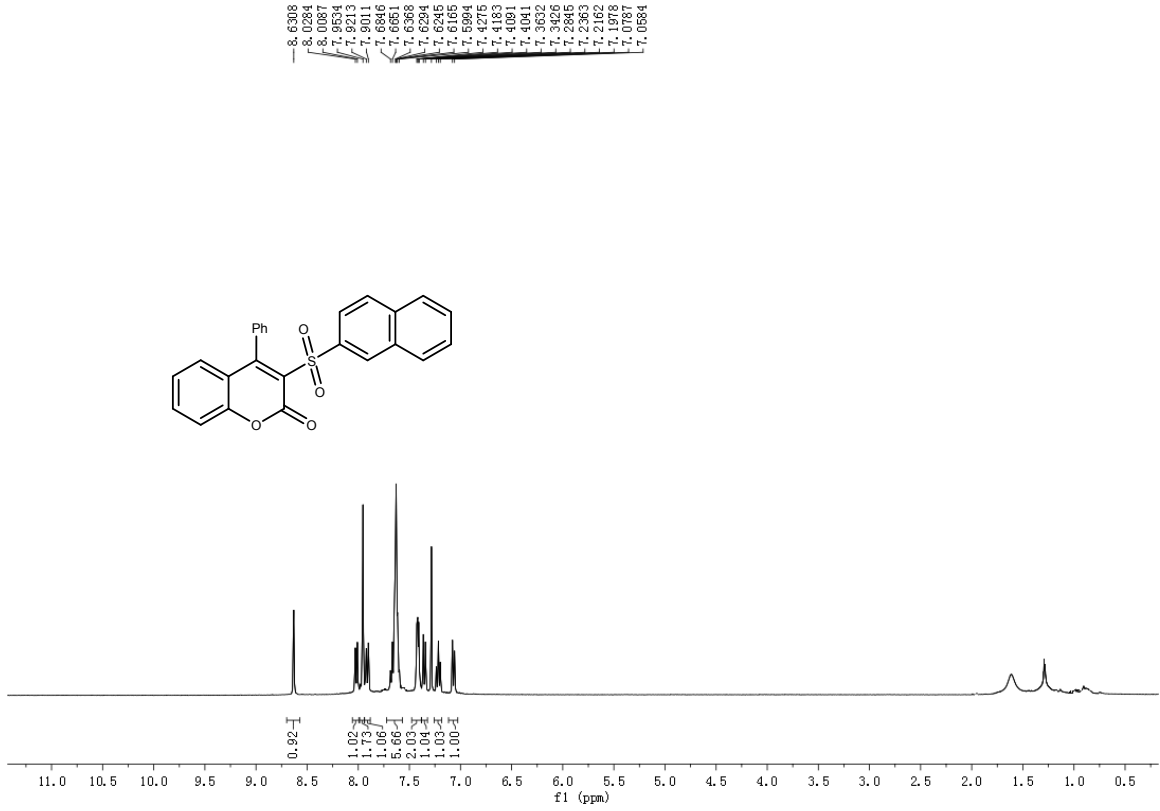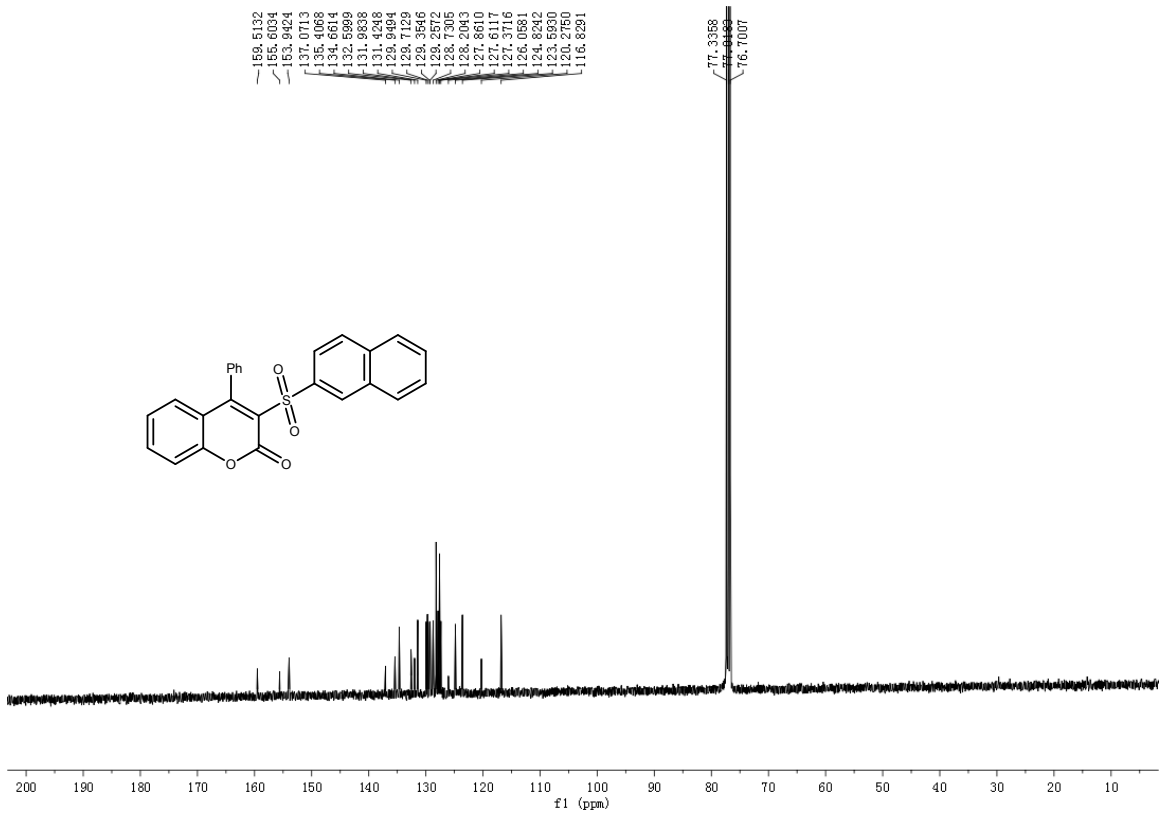

Supplement: c4cc08117j1.pdf [file c4cc08117j1.pdf]
